# Supplementary material for: Uses of NHANES Biomarker Data for Chemical Risk Assessment: Trends, Challenges, and Opportunities
Source: PubMed Central journal article supplement (PMC4590763; doi:10.1289/ehp.1409177), 2015-04-10
Supplement: ehp.1409177.s001.acco.pdf [file ehp.1409177.s001.acco.pdf]

**Note to Readers:** *EHP* strives to ensure that all journal content is accessible to all readers. However, some figures and Supplemental Material published in *EHP* articles may not conform to 508 standards due to the complexity of the information being presented. If you need assistance accessing journal content, please contact [ehp508@niehs.nih.gov](mailto:ehp508@niehs.nih.gov). Our staff will work with you to assess and meet your accessibility needs within 3 working days.

## **Supplemental Material**

### **Uses of NHANES Biomarker Data for Chemical Risk Assessment: Trends, Challenges, and Opportunities**

Jon R. Sobus, Robert S. DeWoskin, Yu-Mei Tan, Joachim D. Pleil, Martin Blake Phillips,  
Barbara Jane George, Krista Christensen, Dina M. Schreinemachers, Marc A. Williams, Elaine  
A. Cohen Hubal, and Stephen W. Edwards

#### **Table of Contents**

**Table S1.** Search focus, PubMed search strings, and number of publications associated with each step of the literature review. (PubMed searches were performed in May 2014.)

**Table S2.** Publications that utilized chemical biomarker data from the U.S. NHANES. Papers are organized by chemical group, analysis category, then year of publication.

#### **References**

**Table S1.** Search focus, PubMed search strings, and number of publications associated with each step of the literature review. (PubMed searches were performed in May 2014.)

| Search step                     | Search focus                        | Search string (PubMed advanced search builder)                                                                                                                                                                                                                                                                                                                                                                                                                                                                                             | # of publications |
|---------------------------------|-------------------------------------|--------------------------------------------------------------------------------------------------------------------------------------------------------------------------------------------------------------------------------------------------------------------------------------------------------------------------------------------------------------------------------------------------------------------------------------------------------------------------------------------------------------------------------------------|-------------------|
| Preliminary search <sup>a</sup> | NHANES                              | ((NHANES[Title/Abstract]) OR (National Health and Nutrition Examination Survey[Title/Abstract])) AND ("1999/01/01"[Date - Publication] : "2013/12/31"[Date - Publication])                                                                                                                                                                                                                                                                                                                                                                 | 5606              |
| Step 1                          | NHANES + U.S.                       | ((NHANES[Title/Abstract]) OR (National Health and Nutrition Examination Survey[Title/Abstract])) AND ("1999/01/01"[Date - Publication] : "2013/12/31"[Date - Publication]) AND ((United States[Title/Abstract]) OR (U.S.A.[Title/Abstract]) OR (USA[Title/Abstract]) OR (U.S.[Title/Abstract]) OR (US[Title/Abstract]))                                                                                                                                                                                                                    | 3224              |
| Step 2                          | NHANES + U.S. + biomarkers          | ((NHANES[Title/Abstract]) OR (National Health and Nutrition Examination Survey[Title/Abstract])) AND ("1999/01/01"[Date - Publication] : "2013/12/31"[Date - Publication]) AND ((United States[Title/Abstract]) OR (U.S.A.[Title/Abstract]) OR (USA[Title/Abstract]) OR (U.S.[Title/Abstract]) OR (US[Title/Abstract])) AND ((biomarker[Title/Abstract]) OR (biomarkers[Title/Abstract]) OR (biomonitoring[Title/Abstract]) OR (urine[Title/Abstract]) OR (urinary[Title/Abstract]) OR (blood[Title/Abstract]) OR (serum[Title/Abstract])) | 1382              |
| Manual curation                 | NHANES + U.S. + chemical biomarkers | NA <sup>b</sup>                                                                                                                                                                                                                                                                                                                                                                                                                                                                                                                            | 273               |

<sup>a</sup>Results from the preliminary search were not included in the analysis since non-U.S. NHANES studies were identified. <sup>b</sup>Manual curation involved a review of titles and abstracts for publications identified in step 2 of the review.

**Table S2.** Publications that utilized chemical biomarker data from the U.S. NHANES. Papers are organized by chemical group, analysis category, then year of publication.

| <b>Publication title</b>                                                                                                                      | <b>Chemical group</b> | <b>Analysis category</b> | <b>Reference</b>        |
|-----------------------------------------------------------------------------------------------------------------------------------------------|-----------------------|--------------------------|-------------------------|
| Elevated house dust and serum concentrations of PBDEs in California: unintended consequences of furniture flammability standards?             | BFRs                  | exposure assessment      | (Zota et al. 2008)      |
| Serum concentrations of polybrominated diphenyl ethers (PBDEs) and polybrominated biphenyl (PBB) in the United States population: 2003-2004.  | BFRs                  | exposure assessment      | (Sjodin et al. 2008)    |
| Serum levels of polybrominated diphenyl ethers (PBDEs) in foam recyclers and carpet installers working in the United States.                  | BFRs                  | exposure assessment      | (Stapleton et al. 2008) |
| Diet contributes significantly to the body burden of PBDEs in the general U.S. population.                                                    | BFRs                  | exposure assessment      | (Fraser et al. 2009)    |
| Improving infant exposure and health risk estimates: using serum data to predict polybrominated diphenyl ether concentrations in breast milk. | BFRs                  | exposure assessment      | (Marchitti et al. 2013) |
| Association of brominated flame retardants with diabetes and metabolic syndrome in the U.S. population, 2003-2004.                            | BFRs                  | health association       | (Lim et al. 2008)       |
| Age-specific reference ranges for polychlorinated biphenyls (PCB) based on the NHANES 2001-2002 survey.                                       | dioxins/furans/PCBs   | exposure assessment      | (Nichols et al. 2007)   |

| <b>Publication title</b>                                                                                                                                                                 | <b>Chemical group</b> | <b>Analysis category</b> | <b>Reference</b>      |
|------------------------------------------------------------------------------------------------------------------------------------------------------------------------------------------|-----------------------|--------------------------|-----------------------|
| Evaluation of PCDD/F and dioxin-like PCB serum concentration data from the 2001-2002 National Health and Nutrition Examination Survey of the United States population.                   | dioxins/furans/PCBs   | exposure assessment      | (Ferriby et al. 2007) |
| Addendum to: Evaluation of PCDD/F and dioxin-like PCB serum concentration data from the 2001-2002 National Health and Nutrition Examination Survey of the United States population.      | dioxins/furans/PCBs   | exposure assessment      | (Scott et al. 2008)   |
| Serum dioxin levels in residents of Calcasieu and Lafayette parishes, Louisiana with comparison to the US population.                                                                    | dioxins/furans/PCBs   | exposure assessment      | (Wong le et al. 2008) |
| Evaluation of background exposures of Americans to dioxin-like compounds in the 1990s and the 2000s.                                                                                     | dioxins/furans/PCBs   | exposure assessment      | (Lorber et al. 2009)  |
| Perspective on serum dioxin levels in the United States: an evaluation of the NHANES data.                                                                                               | dioxins/furans/PCBs   | exposure assessment      | (LaKind et al. 2009)  |
| Regression models to estimate total polychlorinated biphenyls in the general US population: 2001-2002 and 2003-2004.                                                                     | dioxins/furans/PCBs   | exposure assessment      | (Jain and Wang 2010)  |
| Association of caffeine consumption and smoking status with the serum concentrations of polychlorinated biphenyls, dioxins, and furans in the general U.S. population: NHANES 2003-2004. | dioxins/furans/PCBs   | exposure assessment      | (Jain and Wang 2011)  |
| Use of pooled samples from the National Health and Nutrition Examination Survey.                                                                                                         | dioxins/furans/PCBs   | exposure assessment      | (Caudill 2012)        |

| <b>Publication title</b>                                                                                                                            | <b>Chemical group</b> | <b>Analysis category</b> | <b>Reference</b>         |
|-----------------------------------------------------------------------------------------------------------------------------------------------------|-----------------------|--------------------------|--------------------------|
| Estimation of age- and sex-specific background human serum concentrations of PCDDs, PCDFs, and PCBs in the UMDES and NHANES populations.            | dioxins/furans/PCBs   | exposure assessment      | (Q Chen et al. 2013)     |
| Bisphenol A (BPA) daily intakes in the United States: estimates from the 2003-2004 NHANES urinary BPA data.                                         | environmental phenols | exposure assessment      | (Lakind and Naiman 2008) |
| Concentrations of the sunscreen agent benzophenone-3 in residents of the United States: National Health and Nutrition Examination Survey 2003-2004. | environmental phenols | exposure assessment      | (Calafat et al. 2008a)   |
| Exposure of the U.S. population to bisphenol A and 4-tertiary-octylphenol: 2003-2004.                                                               | environmental phenols | exposure assessment      | (Calafat et al. 2008c)   |
| Urinary concentrations of triclosan in the U.S. population: 2003-2004.                                                                              | environmental phenols | exposure assessment      | (Calafat et al. 2008b)   |
| Urinary concentrations of four parabens in the U.S. population: NHANES 2005-2006.                                                                   | environmental phenols | exposure assessment      | (Calafat et al. 2010)    |
| Daily intake of bisphenol A and potential sources of exposure: 2005-2006 National Health and Nutrition Examination Survey.                          | environmental phenols | exposure assessment      | (Lakind and Naiman 2011) |
| Comparing United States and Canadian population exposures from National Biomonitoring Surveys: bisphenol A intake as a case study.                  | environmental phenols | exposure assessment      | (LaKind et al. 2012)     |
| Urinary bisphenol A concentrations in girls from rural and urban Egypt: a pilot study.                                                              | environmental phenols | exposure assessment      | (Nahar et al. 2012)      |

| <b>Publication title</b>                                                                                                                            | <b>Chemical group</b> | <b>Analysis category</b> | <b>Reference</b>           |
|-----------------------------------------------------------------------------------------------------------------------------------------------------|-----------------------|--------------------------|----------------------------|
| Association of urinary bisphenol A concentration with medical disorders and laboratory abnormalities in adults.                                     | environmental phenols | health association       | (Lang et al. 2008)         |
| Association of urinary bisphenol A concentration with heart disease: evidence from NHANES 2003/06.                                                  | environmental phenols | health association       | (Melzer et al. 2010b)      |
| The impact of bisphenol A and triclosan on immune parameters in the U.S. population, NHANES 2003-2006.                                              | environmental phenols | health association       | (Clayton et al. 2011)      |
| Urinary bisphenol A and obesity: NHANES 2003-2006.                                                                                                  | environmental phenols | health association       | (Carwile and Michels 2011) |
| Urinary bisphenol A and type-2 diabetes in U.S. adults: data from NHANES 2003-2008.                                                                 | environmental phenols | health association       | (Silver et al. 2011)       |
| Association of urinary bisphenol A concentration with allergic asthma: results from the National Health and Nutrition Examination Survey 2005-2006. | environmental phenols | health association       | (Vaidya and Kulkarni 2012) |
| Bisphenol A and Metabolic Syndrome: Results from NHANES.                                                                                            | environmental phenols | health association       | (Teppala et al. 2012)      |
| Bisphenol A and peripheral arterial disease: results from the NHANES.                                                                               | environmental phenols | health association       | (Shankar et al. 2012)      |
| Bisphenol A and chronic disease risk factors in US children.                                                                                        | environmental phenols | health association       | (Eng et al. 2013)          |
| Bisphenol A exposure is associated with low-grade urinary albumin excretion in children of the United States.                                       | environmental phenols | health association       | (Trasande et al. 2013b)    |

| <b>Publication title</b>                                                                                            | <b>Chemical group</b> | <b>Analysis category</b> | <b>Reference</b>             |
|---------------------------------------------------------------------------------------------------------------------|-----------------------|--------------------------|------------------------------|
| Relationship between urinary triclosan and paraben concentrations and serum thyroid measures in NHANES 2007-2008.   | environmental phenols | health association       | (Koeppel et al. 2013)        |
| Urinary bisphenol A and obesity in U.S. children.                                                                   | environmental phenols | health association       | (Bhandari et al. 2013)       |
| Relationship of ascorbic acid to blood lead levels.                                                                 | metals/metalloids     | exposure assessment      | (Simon and Hudes 1999)       |
| Blood lead levels in young children-United States and selected states, 1996-1999.                                   | metals/metalloids     | exposure assessment      | (CDC 2000)                   |
| Elevated blood lead levels and blood lead screening among US children aged one to five years: 1988-1994.            | metals/metalloids     | exposure assessment      | (Kaufmann et al. 2000)       |
| Exposure of the U.S. population aged 6 years and older to cadmium: 1988-1994.                                       | metals/metalloids     | exposure assessment      | (Paschal et al. 2000)        |
| Blood and hair mercury levels in young children and women of childbearing age-United States, 1999.                  | metals/metalloids     | exposure assessment      | (CDC 2001)                   |
| Urinary cadmium elimination as a biomarker of exposure for evaluating a cadmium dietary exposure-biokinetics model. | metals/metalloids     | exposure assessment      | (Choudhury et al. 2001)      |
| An exposure assessment for methylmercury from seafood for consumers in the United States.                           | metals/metalloids     | exposure assessment      | (Carrington and Bolger 2002) |
| Economic gains resulting from the reduction in children's exposure to lead in the United States.                    | metals/metalloids     | exposure assessment      | (Grosse et al. 2002)         |

| <b>Publication title</b>                                                                                                                                                                                                                                        | <b>Chemical group</b> | <b>Analysis category</b> | <b>Reference</b>            |
|-----------------------------------------------------------------------------------------------------------------------------------------------------------------------------------------------------------------------------------------------------------------|-----------------------|--------------------------|-----------------------------|
| Lead-based paint health risk assessment in dependent children living in military housing.                                                                                                                                                                       | metals/metalloids     | exposure assessment      | (Stroop et al. 2002)        |
| The relationship between blood lead levels and periodontal bone loss in the United States, 1988-1994.                                                                                                                                                           | metals/metalloids     | exposure assessment      | (Dye et al. 2002)           |
| Blood mercury levels in US children and women of childbearing age, 1999-2000.                                                                                                                                                                                   | metals/metalloids     | exposure assessment      | (Schober et al. 2003)       |
| Changing trends in the epidemiology of pediatric lead exposure: interrelationship of blood lead and ZPP concentrations and a comparison to the US population.                                                                                                   | metals/metalloids     | exposure assessment      | (Soldin et al. 2003)        |
| Prevalence of blood lead levels $\geq$ 5 micro g/dL among US children 1 to 5 years of age and socioeconomic and demographic factors associated with blood of lead levels 5 to 10 micro g/dL, Third National Health and Nutrition Examination Survey, 1988-1994. | metals/metalloids     | exposure assessment      | (Bernard and McGeehin 2003) |
| Second-hand smoke exposure and blood lead levels in U.S. children.                                                                                                                                                                                              | metals/metalloids     | exposure assessment      | (Mannino et al. 2003)       |
| Surveillance for elevated blood lead levels among children-- United States, 1997-2001.                                                                                                                                                                          | metals/metalloids     | exposure assessment      | (Meyer et al. 2003)         |
| An intervention analysis for the reduction of exposure to methylmercury from the consumption of seafood by women of child-bearing age.                                                                                                                          | metals/metalloids     | exposure assessment      | (Carrington et al. 2004)    |



| <b>Publication title</b>                                                                                                                                                              | <b>Chemical group</b> | <b>Analysis category</b> | <b>Reference</b>           |
|---------------------------------------------------------------------------------------------------------------------------------------------------------------------------------------|-----------------------|--------------------------|----------------------------|
| Blood lead levels in U.S. workers, 1988-1994.                                                                                                                                         | metals/metalloids     | exposure assessment      | (Yassin et al. 2004)       |
| Blood mercury levels in young children and childbearing-aged women-United States, 1999-2002.                                                                                          | metals/metalloids     | exposure assessment      | (CDC 2004)                 |
| Blood organic mercury and dietary mercury intake: National Health and Nutrition Examination Survey, 1999 and 2000.                                                                    | metals/metalloids     | exposure assessment      | (Mahaffey et al. 2004)     |
| Bone density-related predictors of blood lead level among peri- and postmenopausal women in the United States: The Third National Health and Nutrition Examination Survey, 1988-1994. | metals/metalloids     | exposure assessment      | (Nash et al. 2004)         |
| Urinary cadmium levels in the US working population, 1988-1994.                                                                                                                       | metals/metalloids     | exposure assessment      | (Yassin and Martonik 2004) |
| Active and passive smoking and blood lead levels in U.S. adults: data from the Third National Health and Nutrition Examination Survey.                                                | metals/metalloids     | exposure assessment      | (Mannino et al. 2005)      |
| Blood lead levels-United States, 1999-2002.                                                                                                                                           | metals/metalloids     | exposure assessment      | (CDC 2005)                 |
| Demographic and socioeconomic factors associated with blood lead levels among Mexican-American children and adolescents in the United States.                                         | metals/metalloids     | exposure assessment      | (Morales et al. 2005)      |
| Determinants of the blood lead level of US women of reproductive age.                                                                                                                 | metals/metalloids     | exposure assessment      | (Lee et al. 2005)          |

| <b>Publication title</b>                                                                                                                                            | <b>Chemical group</b> | <b>Analysis category</b> | <b>Reference</b>        |
|---------------------------------------------------------------------------------------------------------------------------------------------------------------------|-----------------------|--------------------------|-------------------------|
| Mercury exposure: medical and public health issues.                                                                                                                 | metals/metalloids     | exposure assessment      | (Mahaffey 2005)         |
| Urinary mercury concentrations associated with dental restorations in adult women aged 16-49 years: United States, 1999-2000.                                       | metals/metalloids     | exposure assessment      | (Dye et al. 2005)       |
| Blood lead concentrations in children and method of water fluoridation in the United States, 1988-1994.                                                             | metals/metalloids     | exposure assessment      | (Macek et al. 2006)     |
| Blood lead levels in primary school children in Trinidad and Tobago.                                                                                                | metals/metalloids     | exposure assessment      | (Rajkumar et al. 2006)  |
| Validation of a 20-year forecast of US childhood lead poisoning: Updated prospects for 2010.                                                                        | metals/metalloids     | exposure assessment      | (Jacobs and Nevin 2006) |
| Use of Markov Chain Monte Carlo analysis with a physiologically-based pharmacokinetic model of methylmercury to estimate exposures in US women of childbearing age. | metals/metalloids     | exposure assessment      | (Allen et al. 2007)     |
| Estimated burden of blood lead levels 5 microg/dl in 1999-2002 and declines from 1988 to 1994.                                                                      | metals/metalloids     | exposure assessment      | (Iqbal et al. 2008)     |
| Methylmercury and omega-3 fatty acids: co-occurrence of dietary sources with emphasis on fish and shellfish.                                                        | metals/metalloids     | exposure assessment      | (Mahaffey et al. 2008)  |
| Adult women's blood mercury concentrations vary regionally in the United States: association with patterns of fish consumption (NHANES 1999-2004).                  | metals/metalloids     | exposure assessment      | (Mahaffey et al. 2009)  |

| <b>Publication title</b>                                                                                                                                             | <b>Chemical group</b> | <b>Analysis category</b> | <b>Reference</b>         |
|----------------------------------------------------------------------------------------------------------------------------------------------------------------------|-----------------------|--------------------------|--------------------------|
| Exposure of U.S. children to residential dust lead, 1999-2004: II. The contribution of lead-contaminated dust to children's blood lead levels.                       | metals/metalloids     | exposure assessment      | (Dixon et al. 2009)      |
| Herbal supplement use and blood lead levels of United States adults.                                                                                                 | metals/metalloids     | exposure assessment      | (Buettner et al. 2009)   |
| Levels of urinary total and speciated arsenic in the US population: National Health and Nutrition Examination Survey 2003-2004.                                      | metals/metalloids     | exposure assessment      | (Caldwell et al. 2009a)  |
| Tobacco smoke exposure and levels of urinary metals in the U.S. youth and adult population: the National Health and Nutrition Examination Survey (NHANES) 1999-2004. | metals/metalloids     | exposure assessment      | (Richter et al. 2009)    |
| Total blood mercury concentrations in the U.S. population: 1999-2006.                                                                                                | metals/metalloids     | exposure assessment      | (Caldwell et al. 2009b)  |
| Trends in blood lead levels and blood lead testing among US children aged 1 to 5 years, 1988-2004.                                                                   | metals/metalloids     | exposure assessment      | (Jones et al. 2009)      |
| Biological variation of laboratory analytes based on the 1999-2002 National Health and Nutrition Examination Survey.                                                 | metals/metalloids     | exposure assessment      | (Lacher et al. 2010)     |
| Blood cadmium levels in women of childbearing age vary by race/ethnicity.                                                                                            | metals/metalloids     | exposure assessment      | (Mijal and Holzman 2010) |
| Blood lead and mercury levels in pregnant women in the United States, 2003-2008.                                                                                     | metals/metalloids     | exposure assessment      | (Jones et al. 2010)      |

| <b>Publication title</b>                                                                                                               | <b>Chemical group</b> | <b>Analysis category</b> | <b>Reference</b>              |
|----------------------------------------------------------------------------------------------------------------------------------------|-----------------------|--------------------------|-------------------------------|
| Heavy metals exposures among Mexican farmworkers in eastern North Carolina.                                                            | metals/metalloids     | exposure assessment      | (Quandt et al. 2010)          |
| Physiologically based pharmacokinetic (PBPK) tool kit for environmental pollutants--metals.                                            | metals/metalloids     | exposure assessment      | (Ruiz et al. 2010)            |
| Probabilistic Modeling of Dietary Arsenic Exposure and Dose and Evaluation with 2003-2004 NHANES Data.                                 | metals/metalloids     | exposure assessment      | (Xue et al. 2010)             |
| Geographic region of residence and blood lead levels in US children: results of the National Health and Nutrition Examination Survey.  | metals/metalloids     | exposure assessment      | (Scott and Nguyen 2011)       |
| Seafood intake and urine concentrations of total arsenic, dimethylarsinate and arsenobetaine in the US population.                     | metals/metalloids     | exposure assessment      | (Navas-Acien et al. 2011)     |
| Smoking status and urine cadmium above levels associated with subclinical renal effects in U.S. adults without chronic kidney disease. | metals/metalloids     | exposure assessment      | (Mortensen et al. 2011)       |
| Blood lead levels in the United States "oldest-old" population.                                                                        | metals/metalloids     | exposure assessment      | (Vearrier and Greenberg 2012) |
| Reduction in cadmium exposure in the United States population, 1988-2008: the contribution of declining smoking rates.                 | metals/metalloids     | exposure assessment      | (Tellez-Plaza et al. 2012a)   |
| Rice consumption and urinary arsenic concentrations in U.S. children.                                                                  | metals/metalloids     | exposure assessment      | (Davis et al. 2012)           |

| <b>Publication title</b>                                                                                                                                              | <b>Chemical group</b> | <b>Analysis category</b> | <b>Reference</b>              |
|-----------------------------------------------------------------------------------------------------------------------------------------------------------------------|-----------------------|--------------------------|-------------------------------|
| Secondhand tobacco smoke: a source of lead exposure in US children and adolescents.                                                                                   | metals/metalloids     | exposure assessment      | (Apostolou et al. 2012)       |
| A multi-level model of blood lead as a function of air lead.                                                                                                          | metals/metalloids     | exposure assessment      | (Richmond-Bryant et al. 2013) |
| Blood lead levels in children aged 1-5 years - United States, 1999-2010.                                                                                              | metals/metalloids     | exposure assessment      | (Wheeler and Brown 2013)      |
| Calibrating sensitivity analyses to observed covariates in observational studies.                                                                                     | metals/metalloids     | exposure assessment      | (Hsu and Small 2013)          |
| Rice consumption and urinary concentrations of arsenic in US adults.                                                                                                  | metals/metalloids     | exposure assessment      | (Wei et al. 2014)             |
| Trends in tobacco smoke exposure and blood lead levels among youths and adults in the United States: the National Health and Nutrition Examination Survey, 1999-2008. | metals/metalloids     | exposure assessment      | (Richter et al. 2013)         |
| Urinary cadmium in the 1999-2008 U.S. National Health and Nutrition Examination Survey (NHANES).                                                                      | metals/metalloids     | exposure assessment      | (Riederer et al. 2013)        |
| Association of dental caries and blood lead levels.                                                                                                                   | metals/metalloids     | health association       | (Moss et al. 1999)            |
| Blood lead concentration and children's anthropometric dimensions in the Third National Health and Nutrition Examination Survey (NHANES III), 1988-1994.              | metals/metalloids     | health association       | (Ballew et al. 1999)          |

| <b>Publication title</b>                                                                                                                                                               | <b>Chemical group</b> | <b>Analysis category</b> | <b>Reference</b>               |
|----------------------------------------------------------------------------------------------------------------------------------------------------------------------------------------|-----------------------|--------------------------|--------------------------------|
| Serum magnesium and ischaemic heart disease: findings from a national sample of US adults.                                                                                             | metals/metalloids     | health association       | (Ford 1999)                    |
| Cognitive deficits associated with blood lead concentrations <10 microg/dL in US children and adolescents.                                                                             | metals/metalloids     | health association       | (Lanphear et al. 2000)         |
| Serum copper concentration and coronary heart disease among US adults.                                                                                                                 | metals/metalloids     | health association       | (Ford 2000)                    |
| Blood lead levels and mortality.                                                                                                                                                       | metals/metalloids     | health association       | (Lustberg and Silbergeld 2002) |
| The association of blood lead level and cancer mortality among whites in the United States.                                                                                            | metals/metalloids     | health association       | (Jemal et al. 2002)            |
| Blood lead and chronic kidney disease in the general United States population: results from NHANES III.                                                                                | metals/metalloids     | health association       | (Muntner et al. 2003)          |
| Blood lead levels and sexual maturation in U.S. girls: the Third National Health and Nutrition Examination Survey, 1988-1994.                                                          | metals/metalloids     | health association       | (Wu et al. 2003)               |
| Blood lead, blood pressure, and hypertension in perimenopausal and postmenopausal women.                                                                                               | metals/metalloids     | health association       | (Nash et al. 2003)             |
| Can the National Health and Nutrition Examination Survey III (NHANES III) data help resolve the controversy over low blood lead levels and neuropsychological development in children? | metals/metalloids     | health association       | (Stone and Reynolds 2003)      |

| <b>Publication title</b>                                                                                                                                | <b>Chemical group</b> | <b>Analysis category</b> | <b>Reference</b>          |
|---------------------------------------------------------------------------------------------------------------------------------------------------------|-----------------------|--------------------------|---------------------------|
| Urinary cadmium, impaired fasting glucose, and diabetes in the NHANES III.                                                                              | metals/metalloids     | health association       | (Schwartz et al. 2003)    |
| Lead, cadmium, smoking, and increased risk of peripheral arterial disease.                                                                              | metals/metalloids     | health association       | (Navas-Acien et al. 2004) |
| Serum iron, copper and zinc concentrations and risk of cancer mortality in US adults.                                                                   | metals/metalloids     | health association       | (Wu et al. 2004)          |
| Urinary cadmium levels predict lower lung function in current and former smokers: data from the Third National Health and Nutrition Examination Survey. | metals/metalloids     | health association       | (Mannino et al. 2004)     |
| Blood mercury level and blood pressure among US women: results from the National Health and Nutrition Examination Survey 1999-2000.                     | metals/metalloids     | health association       | (Vupputuri et al. 2005)   |
| Continued decline in blood lead levels among adults in the United States: the National Health and Nutrition Examination Surveys.                        | metals/metalloids     | health association       | (Muntner et al. 2005)     |
| Metals in urine and peripheral arterial disease.                                                                                                        | metals/metalloids     | health association       | (Navas-Acien et al. 2005) |
| Blood lead below 0.48 micromol/L (10 microg/dL) and mortality among US adults.                                                                          | metals/metalloids     | health association       | (Menke et al. 2006)       |
| Blood lead levels and death from all causes, cardiovascular disease, and cancer: results from the NHANES III mortality study.                           | metals/metalloids     | health association       | (Schober et al. 2006)     |

| <b>Publication title</b>                                                                                                                                                                                    | <b>Chemical group</b> | <b>Analysis category</b> | <b>Reference</b>           |
|-------------------------------------------------------------------------------------------------------------------------------------------------------------------------------------------------------------|-----------------------|--------------------------|----------------------------|
| Exposures to environmental toxicants and attention deficit hyperactivity disorder in U.S. children.                                                                                                         | metals/metalloids     | health association       | (Braun et al. 2006)        |
| Graded associations of blood lead and urinary cadmium concentrations with oxidative-stress-related markers in the U.S. population: results from the Third National Health and Nutrition Examination Survey. | metals/metalloids     | health association       | (Lee et al. 2006)          |
| Lead exposure and periodontitis in US adults.                                                                                                                                                               | metals/metalloids     | health association       | (Saraiva et al. 2007)      |
| Arsenic exposure and prevalence of type 2 diabetes in US adults.                                                                                                                                            | metals/metalloids     | health association       | (Navas-Acien et al. 2008)  |
| Association of environmental toxicants and conduct disorder in U.S. children: NHANES 2001-2004.                                                                                                             | metals/metalloids     | health association       | (Braun et al. 2008)        |
| Cadmium exposure and hypertension in the 1999-2004 National Health and Nutrition Examination Survey (NHANES).                                                                                               | metals/metalloids     | health association       | (Tellez-Plaza et al. 2008) |
| The association of urinary cadmium with sex steroid hormone concentrations in a general population sample of US adult men.                                                                                  | metals/metalloids     | health association       | (Menke et al. 2008)        |
| Urinary cadmium and osteoporosis in U.S. Women $\geq$ 50 years of age: NHANES 1988-1994 and 1999-2004.                                                                                                      | metals/metalloids     | health association       | (Gallagher et al. 2008)    |
| Assessment of chronic mercury exposure within the U.S. population, National Health and Nutrition Examination Survey, 1999-2006.                                                                             | metals/metalloids     | health association       | (Laks 2009)                |



| <b>Publication title</b>                                                                                                          | <b>Chemical group</b> | <b>Analysis category</b> | <b>Reference</b>           |
|-----------------------------------------------------------------------------------------------------------------------------------|-----------------------|--------------------------|----------------------------|
| Association of environmental cadmium exposure with periodontal disease in U.S. adults.                                            | metals/metalloids     | health association       | (Arora et al. 2009)        |
| Association of tobacco and lead exposures with attention-deficit/hyperactivity disorder.                                          | metals/metalloids     | health association       | (Froehlich et al. 2009)    |
| Blood cadmium and lead and chronic kidney disease in US adults: a joint analysis.                                                 | metals/metalloids     | health association       | (Navas-Acien et al. 2009)  |
| Blood lead levels and major depressive disorder, panic disorder, and generalized anxiety disorder in US young adults.             | metals/metalloids     | health association       | (Bouchard et al. 2009)     |
| Cadmium levels in urine and mortality among U.S. adults.                                                                          | metals/metalloids     | health association       | (Menke et al. 2009)        |
| Low-level population exposure to inorganic arsenic in the United States and diabetes mellitus: a reanalysis.                      | metals/metalloids     | health association       | (Steinmaus et al. 2009)    |
| A population-based study of blood lead levels in relation to depression in the United States.                                     | metals/metalloids     | health association       | (Golub et al. 2010)        |
| Association between lead and cadmium and reproductive hormones in peripubertal U.S. girls.                                        | metals/metalloids     | health association       | (Gollenberg et al. 2010)   |
| Blood lead level and kidney function in US adolescents: The Third National Health and Nutrition Examination Survey.               | metals/metalloids     | health association       | (Fadrowski et al. 2010)    |
| Cadmium and peripheral arterial disease: gender differences in the 1999-2004 US National Health and Nutrition Examination Survey. | metals/metalloids     | health association       | (Tellez-Plaza et al. 2010) |

| <b>Publication title</b>                                                                                                                                                       | <b>Chemical group</b> | <b>Analysis category</b> | <b>Reference</b>              |
|--------------------------------------------------------------------------------------------------------------------------------------------------------------------------------|-----------------------|--------------------------|-------------------------------|
| Cadmium, follicle-stimulating hormone, and effects on bone in women age 42-60 years, NHANES III.                                                                               | metals/metalloids     | health association       | (Gallagher et al. 2010b)      |
| Environmental cadmium and breast cancer risk.                                                                                                                                  | metals/metalloids     | health association       | (Gallagher et al. 2010a)      |
| Low level exposure to cadmium increases the risk of chronic kidney disease: analysis of the NHANES 1999-2006.                                                                  | metals/metalloids     | health association       | (Ferraro et al. 2010)         |
| Modification by ALAD of the association between blood lead and blood pressure in the U.S. population: results from the Third National Health and Nutrition Examination Survey. | metals/metalloids     | health association       | (Scinicariello 2010)          |
| Urinary cadmium, osteopenia, and osteoporosis in the US population.                                                                                                            | metals/metalloids     | health association       | (Wu et al. 2010)              |
| Association of low-level blood lead and blood pressure in NHANES 1999-2006.                                                                                                    | metals/metalloids     | health association       | (Scinicariello et al. 2011)   |
| Blood lead levels in relation to cognitive function in older U.S. adults.                                                                                                      | metals/metalloids     | health association       | (van Wijngaarden et al. 2011) |
| Heavy metals exposure and hearing loss in US adolescents.                                                                                                                      | metals/metalloids     | health association       | (Shargorodsky et al. 2011)    |
| Total blood mercury and serum measles antibodies in US children, NHANES 2003-2004.                                                                                             | metals/metalloids     | health association       | (Gallagher et al. 2011)       |

| <b>Publication title</b>                                                                                                                                | <b>Chemical group</b> | <b>Analysis category</b> | <b>Reference</b>             |
|---------------------------------------------------------------------------------------------------------------------------------------------------------|-----------------------|--------------------------|------------------------------|
| Total blood mercury, plasma homocysteine, methylmalonic acid and folate in US children aged 3-5 years, NHANES 1999-2004.                                | metals/metalloids     | health association       | (Gallagher and Meliker 2011) |
| Urine arsenic and hypertension in US adults: the 2003-2008 National Health and Nutrition Examination Survey.                                            | metals/metalloids     | health association       | (Jones et al. 2011)          |
| Urine arsenic concentration and obstructive pulmonary disease in the U.S. population.                                                                   | metals/metalloids     | health association       | (Amster et al. 2011)         |
| Association of homocysteine levels with blood lead levels and micronutrients in the US general population.                                              | metals/metalloids     | health association       | (Lee et al. 2012)            |
| Association of markers of chronic viral hepatitis and blood mercury levels in US reproductive-age women from NHANES 2001-2008: a cross-sectional study. | metals/metalloids     | health association       | (Sheehan et al. 2012)        |
| Cadmium exposure and all-cause and cardiovascular mortality in the U.S. general population.                                                             | metals/metalloids     | health association       | (Tellez-Plaza et al. 2012b)  |
| Cadmium exposure and cancer mortality in the Third National Health and Nutrition Examination Survey cohort.                                             | metals/metalloids     | health association       | (Adams et al. 2012)          |
| Cadmium exposure and neurodevelopmental outcomes in U.S. children.                                                                                      | metals/metalloids     | health association       | (Ciesielski et al. 2012)     |
| Environmental cadmium and lead exposures and hearing loss in U.S. adults: the National Health and Nutrition Examination Survey, 1999 to 2004.           | metals/metalloids     | health association       | (Choi et al. 2012)           |

| <b>Publication title</b>                                                                                                                                            | <b>Chemical group</b> | <b>Analysis category</b> | <b>Reference</b>             |
|---------------------------------------------------------------------------------------------------------------------------------------------------------------------|-----------------------|--------------------------|------------------------------|
| Lead and cadmium levels and balance and vestibular dysfunction among adult participants in the National Health and Nutrition Examination Survey (NHANES) 1999-2004. | metals/metalloids     | health association       | (KB Min et al. 2012)         |
| Mercury and thyroid autoantibodies in U.S. women, NHANES 2007-2008.                                                                                                 | metals/metalloids     | health association       | (Gallagher and Meliker 2012) |
| Temporal trend of cadmium exposure in the United States population suggests gender specificities.                                                                   | metals/metalloids     | health association       | (Ferraro et al. 2012)        |
| The association between urinary cadmium and frontal T wave axis deviation in the US adults.                                                                         | metals/metalloids     | health association       | (Faramawi et al. 2012)       |
| Urinary heavy metals and associated medical conditions in the US adult population.                                                                                  | metals/metalloids     | health association       | (Mendy et al. 2012)          |
| Association between blood lead and walking speed in the National Health and Nutrition Examination Survey (NHANES 1999-2002).                                        | metals/metalloids     | health association       | (Ji et al. 2013)             |
| Association between total blood mercury and exhaled nitric oxide in US adults.                                                                                      | metals/metalloids     | health association       | (Min and Min 2013)           |
| Associations between cadmium exposure and neurocognitive test scores in a cross-sectional study of US adults.                                                       | metals/metalloids     | health association       | (Ciesielski et al. 2013)     |
| Associations of blood and urinary mercury with hypertension in U.S. adults: the NHANES 2003-2006.                                                                   | metals/metalloids     | health association       | (Park et al. 2013)           |

| <b>Publication title</b>                                                                                                                | <b>Chemical group</b> | <b>Analysis category</b> | <b>Reference</b>           |
|-----------------------------------------------------------------------------------------------------------------------------------------|-----------------------|--------------------------|----------------------------|
| Blood cadmium is elevated in iron deficient U.S. children: a cross-sectional study.                                                     | metals/metalloids     | health association       | (Silver et al. 2013)       |
| Cadmium exposure and liver disease among US adults.                                                                                     | metals/metalloids     | health association       | (Hyder et al. 2013)        |
| Menopause and lead body burden among US women aged 45-55, NHANES 1999-2010.                                                             | metals/metalloids     | health association       | (Mendola et al. 2013)      |
| Metals in blood and urine, and thyroid function among adults in the United States 2007-2008.                                            | metals/metalloids     | health association       | (Christensen 2013)         |
| Methylmercury and elemental mercury differentially associate with blood pressure among dental professionals.                            | metals/metalloids     | health association       | (Goodrich et al. 2013)     |
| Potential health impacts of heavy metals on HIV-infected population in USA.                                                             | metals/metalloids     | health association       | (XH Xu et al. 2013)        |
| Serum heavy metals and obstructive lung disease: results from the National Health and Nutrition Examination Survey.                     | metals/metalloids     | health association       | (Rokadia and Agarwal 2013) |
| Thyroid hormones in relation to lead, mercury, and cadmium exposure in the National Health and Nutrition Examination Survey, 2007-2008. | metals/metalloids     | health association       | (AM Chen et al. 2013)      |
| Total blood mercury and rubella antibody concentrations in US children aged 6-11 years, NHANES 2003-2004.                               | metals/metalloids     | health association       | (Gallagher et al. 2013b)   |

| <b>Publication title</b>                                                                                                                                                                            | <b>Chemical group</b> | <b>Analysis category</b> | <b>Reference</b>       |
|-----------------------------------------------------------------------------------------------------------------------------------------------------------------------------------------------------|-----------------------|--------------------------|------------------------|
| Total blood mercury levels and depression among adults in the United States: National Health and Nutrition Examination Survey 2005-2008.                                                            | metals/metalloids     | health association       | (Ng et al. 2013)       |
| Levels of metabolites of organophosphate pesticides, phthalates, and bisphenol A in pooled urine specimens from pregnant women participating in the Norwegian Mother and Child Cohort Study (MoBa). | multi-group           | exposure assessment      | (Ye et al. 2009)       |
| Serum concentrations of selected persistent organic pollutants in a sample of pregnant females and changes in their concentrations during gestation.                                                | multi-group           | exposure assessment      | (Wang et al. 2009)     |
| The CDC fourth national report on human exposure to environmental chemicals: what it tells us about our toxic burden and how it assist environmental medicine physicians.                           | multi-group           | exposure assessment      | (Crinnion 2010)        |
| Blood and urine levels of long half-life toxicants by nativity among immigrants to the United States.                                                                                               | multi-group           | exposure assessment      | (Muennig et al. 2011)  |
| Differential exposure biomarker levels among cigarette smokers and smokeless tobacco consumers in the National Health and Nutrition Examination Survey 1999-2008.                                   | multi-group           | exposure assessment      | (Naufal et al. 2011)   |
| Environmental chemicals in pregnant women in the United States: NHANES 2003-2004.                                                                                                                   | multi-group           | exposure assessment      | (Woodruff et al. 2011) |

| <b>Publication title</b>                                                                                                                                                                                                    | <b>Chemical group</b> | <b>Analysis category</b> | <b>Reference</b>          |
|-----------------------------------------------------------------------------------------------------------------------------------------------------------------------------------------------------------------------------|-----------------------|--------------------------|---------------------------|
| Population variability of phthalate metabolites and bisphenol A concentrations in spot urine samples versus 24- or 48-h collections.                                                                                        | multi-group           | exposure assessment      | (Christensen et al. 2012) |
| Social disparities in exposures to bisphenol A and polyfluoroalkyl chemicals: a cross-sectional study within NHANES 2003-2006.                                                                                              | multi-group           | exposure assessment      | (Nelson et al. 2012)      |
| A method to screen U.S. environmental biomonitoring data for race/ethnicity and income-related disparity.                                                                                                                   | multi-group           | exposure assessment      | (Belova et al. 2013)      |
| Associations between socioeconomic status and environmental toxicant concentrations in adults in the USA: NHANES 2001-2010.                                                                                                 | multi-group           | exposure assessment      | (Tyrrell et al. 2013)     |
| High-throughput models for exposure-based chemical prioritization in the ExpoCast project.                                                                                                                                  | multi-group           | exposure assessment      | (Wambaugh et al. 2013)    |
| Association between serum concentrations of persistent organic pollutants and insulin resistance among nondiabetic adults: results from the National Health and Nutrition Examination Survey 1999-2002.                     | multi-group           | health association       | (Lee et al. 2007a)        |
| Relationship between serum concentrations of persistent organic pollutants and the prevalence of metabolic syndrome among non-diabetic adults: results from the National Health and Nutrition Examination Survey 1999-2002. | multi-group           | health association       | (Lee et al. 2007b)        |
| Polychlorinated biphenyls, lead, and mercury are associated with liver disease in American adults: NHANES 2003-2004.                                                                                                        | multi-group           | health association       | (Cave et al. 2010)        |

| <b>Publication title</b>                                                                                                                                                                                      | <b>Chemical group</b> | <b>Analysis category</b> | <b>Reference</b>           |
|---------------------------------------------------------------------------------------------------------------------------------------------------------------------------------------------------------------|-----------------------|--------------------------|----------------------------|
| Relationship between urinary phthalate and bisphenol A concentrations and serum thyroid measures in U.S. adults and adolescents from the National Health and Nutrition Examination Survey (NHANES) 2007-2008. | multi-group           | health association       | (Meeker and Ferguson 2011) |
| Exposures to endocrine-disrupting chemicals and age of menarche in adolescent girls in NHANES (2003-2008).                                                                                                    | multi-group           | health association       | (Buttke et al. 2012)       |
| Systematic evaluation of environmental factors: persistent pollutants and nutrients correlated with serum lipid levels.                                                                                       | multi-group           | health association       | (Patel et al. 2012)        |
| Investigation of maternal environmental exposures in association with self-reported preterm birth.                                                                                                            | multi-group           | health association       | (Patel et al. 2014)        |
| Persistent organic pollutants and hyperuricemia in the U.S. general population.                                                                                                                               | multi-group           | health association       | (Lee et al. 2013)          |
| Polychlorinated biphenyls, mercury, and antinuclear antibody positivity, NHANES 2003-2004.                                                                                                                    | multi-group           | health association       | (Gallagher et al. 2013a)   |
| Systematic evaluation of environmental and behavioural factors associated with all-cause mortality in the United States National Health and Nutrition Examination Survey.                                     | multi-group           | health association       | (Patel et al. 2013)        |
| Human consumption of methyleugenol and its elimination from serum.                                                                                                                                            | other                 | exposure assessment      | (Schechter et al. 2004)    |
| Perchlorate exposure of the US Population, 2001-2002.                                                                                                                                                         | other                 | exposure assessment      | (Blount et al. 2007)       |



| <b>Publication title</b>                                                                                                                                                                  | <b>Chemical group</b> | <b>Analysis category</b> | <b>Reference</b>      |
|-------------------------------------------------------------------------------------------------------------------------------------------------------------------------------------------|-----------------------|--------------------------|-----------------------|
| Drinking water contribution to aggregate perchlorate intake of reproductive-age women in the United States estimated by dietary intake simulation and analysis of urinary excretion data. | other                 | exposure assessment      | (Mendez et al. 2010)  |
| Exposure of the U.S. population to acrylamide in the National Health and Nutrition Examination Survey 2003-2004.                                                                          | other                 | exposure assessment      | (Vesper et al. 2010)  |
| Direct measurement of perchlorate exposure biomarkers in a highly exposed population: a pilot study.                                                                                      | other                 | exposure assessment      | (English et al. 2011) |
| Estimating perchlorate exposure from food and tap water based on US biomonitoring and occurrence data.                                                                                    | other                 | exposure assessment      | (Huber et al. 2011)   |
| Using a physiologically based pharmacokinetic model to link urinary biomarker concentrations to dietary exposure of perchlorate.                                                          | other                 | exposure assessment      | (YC Yang et al. 2012) |
| Among 10 sociodemographic and lifestyle variables, smoking is strongly associated with biomarkers of acrylamide exposure in a representative sample of the U.S. Population.               | other                 | exposure assessment      | (Vesper et al. 2013)  |
| Urinary perchlorate as a measure of dietary and drinking water exposure in a representative sample of the United States population 2001-2008.                                             | other                 | exposure assessment      | (Lau et al. 2013)     |
| Urinary perchlorate and thyroid hormone levels in adolescent and adult men and women living in the United States.                                                                         | other                 | health association       | (Blount et al. 2006)  |

| <b>Publication title</b>                                                                                                                       | <b>Chemical group</b> | <b>Analysis category</b> | <b>Reference</b>          |
|------------------------------------------------------------------------------------------------------------------------------------------------|-----------------------|--------------------------|---------------------------|
| Comparison of 1-hydroxypyrene exposure in the US population with that in occupational exposure studies.                                        | PAHs                  | exposure assessment      | (Huang et al. 2004)       |
| Levels of 1-hydroxypyrene and other monohydroxy polycyclic aromatic hydrocarbons in children: a study based on U.S. reference range values.    | PAHs                  | exposure assessment      | (Huang et al. 2006)       |
| Reference range levels of polycyclic aromatic hydrocarbons in the US population by measurement of urinary monohydroxy metabolites.             | PAHs                  | exposure assessment      | (Grainger et al. 2006)    |
| Concentration and profile of 22 urinary polycyclic aromatic hydrocarbon metabolites in the US population.                                      | PAHs                  | exposure assessment      | (Li et al. 2008)          |
| Involuntary tobacco smoke exposure and urinary levels of polycyclic aromatic hydrocarbons in the United States, 1999 to 2002.                  | PAHs                  | exposure assessment      | (Suwan-ampai et al. 2009) |
| Polycyclic aromatic hydrocarbon metabolite levels and pediatric allergy and asthma in an inner-city cohort.                                    | PAHs                  | exposure assessment      | (Miller et al. 2010)      |
| Association of urinary polycyclic aromatic hydrocarbons and serum C-reactive protein.                                                          | PAHs                  | health association       | (Everett et al. 2010)     |
| Studying associations between urinary metabolites of polycyclic aromatic hydrocarbons (PAHs) and cardiovascular diseases in the United States. | PAHs                  | health association       | (XH Xu et al. 2010)       |

| <b>Publication title</b>                                                                                                                                                                  | <b>Chemical group</b> | <b>Analysis category</b> | <b>Reference</b>      |
|-------------------------------------------------------------------------------------------------------------------------------------------------------------------------------------------|-----------------------|--------------------------|-----------------------|
| Naphthalene biomarkers and relationship with hemoglobin and hematocrit in White, Black, and Hispanic adults: results from the 2003-2004 National Health and Nutrition Examination Survey. | PAHs                  | health association       | (Sudakin et al. 2013) |
| Studying the effects of polycyclic aromatic hydrocarbons on peripheral arterial disease in the United States.                                                                             | PAHs                  | health association       | (X Xu et al. 2013)    |
| Assessment of human exposure and human health effects after indoor application of methyl parathion in Lorain County, Ohio, 1995-1996.                                                     | pesticides            | exposure assessment      | (Rubin et al. 2002)   |
| Investigation of the relation between self-reported food consumption and household chemical exposures with urinary levels of selected nonpersistent pesticides.                           | pesticides            | exposure assessment      | (Kieszak et al. 2002) |
| Concentrations of dialkyl phosphate metabolites of organophosphorus pesticides in the U.S. population.                                                                                    | pesticides            | exposure assessment      | (Barr et al. 2004)    |
| Estimating pesticide dose from urinary pesticide concentration data by creatinine correction in the Third National Health and Nutrition Examination Survey (NHANES-III).                  | pesticides            | exposure assessment      | (Mage et al. 2004)    |
| Biologic monitoring to characterize organophosphorus pesticide exposure among children and workers: an analysis of recent studies in Washington State.                                    | pesticides            | exposure assessment      | (Fenske et al. 2005)  |
| Concentrations of selective metabolites of organophosphorus pesticides in the United States population.                                                                                   | pesticides            | exposure assessment      | (Barr et al. 2005)    |

| <b>Publication title</b>                                                                                                                                         | <b>Chemical group</b> | <b>Analysis category</b> | <b>Reference</b>            |
|------------------------------------------------------------------------------------------------------------------------------------------------------------------|-----------------------|--------------------------|-----------------------------|
| Organophosphate urinary metabolite levels during pregnancy and after delivery in women living in an agricultural community.                                      | pesticides            | exposure assessment      | (Bradman et al. 2005)       |
| Investigation of job-related pesticide exposure in the Third National Health and Nutrition Examination Survey.                                                   | pesticides            | exposure assessment      | (Allen et al. 2006)         |
| Merging models and biomonitoring data to characterize sources and pathways of human exposure to organophosphorus pesticides in the Salinas Valley of California. | pesticides            | exposure assessment      | (McKone et al. 2007)        |
| Diet and nondiet predictors of urinary 3-phenoxybenzoic acid in NHANES 1999-2002.                                                                                | pesticides            | exposure assessment      | (Riederer et al. 2008)      |
| Evaluating cumulative organophosphorus pesticide body burden of children: a national case study.                                                                 | pesticides            | exposure assessment      | (Payne-Sturges et al. 2009) |
| Comparison of current-use pesticide and other toxicant urinary metabolite levels among pregnant women in the CHAMACOS cohort and NHANES.                         | pesticides            | exposure assessment      | (Castorina et al. 2010)     |
| Organophosphorus and pyrethroid insecticide urinary metabolite concentrations in young children living in a southeastern United States city.                     | pesticides            | exposure assessment      | (Naeher et al. 2010)        |
| Urinary concentrations of metabolites of pyrethroid insecticides in the general U.S. population: National Health and Nutrition Examination Survey 1999-2002.     | pesticides            | exposure assessment      | (Barr et al. 2010)          |

| <b>Publication title</b>                                                                                                                                   | <b>Chemical group</b> | <b>Analysis category</b> | <b>Reference</b>             |
|------------------------------------------------------------------------------------------------------------------------------------------------------------|-----------------------|--------------------------|------------------------------|
| Urinary concentrations of dialkylphosphate metabolites of organophosphorus pesticides: National Health and Nutrition Examination Survey 1999-2004.         | pesticides            | exposure assessment      | (Barr et al. 2011)           |
| A pharmacokinetic model of cis- and trans-permethrin disposition in rats and humans with aggregate exposure application.                                   | pesticides            | exposure assessment      | (Tornerov-Velez et al. 2012) |
| Have regulatory efforts to reduce organophosphorus insecticide exposures been effective?                                                                   | pesticides            | exposure assessment      | (Clune et al. 2012)          |
| Associations of serum concentrations of organochlorine pesticides with breast cancer and prostate cancer in U.S. adults.                                   | pesticides            | health association       | (X Xu et al. 2010)           |
| Attention-deficit/hyperactivity disorder and urinary metabolites of organophosphate pesticides.                                                            | pesticides            | health association       | (Bouchard et al. 2010)       |
| The association between urinary concentrations of dichlorophenol pesticides and obesity in children.                                                       | pesticides            | health association       | (Twum and Wei 2011)          |
| Urinary trichlorophenol levels and increased risk of attention deficit hyperactivity disorder among US school-aged children.                               | pesticides            | health association       | (Xu et al. 2011)             |
| Association between urinary 3, 5, 6-trichloro-2-pyridinol, a metabolite of chlorpyrifos and chlorpyrifos-methyl, and serum T4 and TSH in NHANES 1999-2002. | pesticides            | health association       | (Fortenberry et al. 2012)    |
| Associations between organochlorine pesticides and vitamin D deficiency in the U.S. population.                                                            | pesticides            | health association       | (JH Yang et al. 2012)        |

| <b>Publication title</b>                                                                                                                                                   | <b>Chemical group</b> | <b>Analysis category</b> | <b>Reference</b>       |
|----------------------------------------------------------------------------------------------------------------------------------------------------------------------------|-----------------------|--------------------------|------------------------|
| Dichlorophenol-containing pesticides and allergies: results from the US National Health and Nutrition Examination Survey 2005-2006.                                        | pesticides            | health association       | (Jerschow et al. 2012) |
| Perfluorochemicals in pooled serum samples from United States residents in 2001 and 2002.                                                                                  | PFCs                  | exposure assessment      | (Calafat et al. 2006)  |
| Polyfluoroalkyl chemicals in the U.S. population: data from the National Health and Nutrition Examination Survey (NHANES) 2003-2004 and comparisons with NHANES 1999-2000. | PFCs                  | exposure assessment      | (Calafat et al. 2007b) |
| Serum concentrations of 11 polyfluoroalkyl compounds in the U.S. population: data from the National Health and Nutrition Examination Survey (NHANES).                      | PFCs                  | exposure assessment      | (Calafat et al. 2007a) |
| Polyfluoroalkyl compounds in pooled sera from children participating in the National Health and Nutrition Examination Survey 2001-2002.                                    | PFCs                  | exposure assessment      | (Kato et al. 2009)     |
| Important issues related to using pooled samples for environmental chemical biomonitoring.                                                                                 | PFCs                  | exposure assessment      | (Caudill 2011)         |
| Trends in exposure to polyfluoroalkyl chemicals in the U.S. Population: 1999-2008.                                                                                         | PFCs                  | exposure assessment      | (Kato et al. 2011)     |
| Effect of pregnancy on the levels of selected perfluoroalkyl compounds for females aged 17-39 years: data from National Health and Nutrition Examination Survey 2003-2008. | PFCs                  | exposure assessment      | (Jain 2013)            |

| <b>Publication title</b>                                                                                                                                | <b>Chemical group</b> | <b>Analysis category</b> | <b>Reference</b>      |
|---------------------------------------------------------------------------------------------------------------------------------------------------------|-----------------------|--------------------------|-----------------------|
| Association between serum perfluorooctanoic acid (PFOA) and thyroid disease in the U.S. National Health and Nutrition Examination Survey.               | PFCs                  | health association       | (Melzer et al. 2010a) |
| Exposure to polyfluoroalkyl chemicals and attention deficit/hyperactivity disorder in U.S. children 12-15 years of age.                                 | PFCs                  | health association       | (Hoffman et al. 2010) |
| Exposure to polyfluoroalkyl chemicals and cholesterol, body weight, and insulin resistance in the general U.S. population.                              | PFCs                  | health association       | (Nelson et al. 2010)  |
| Investigation of the associations between low-dose serum perfluorinated chemicals and liver enzymes in US adults.                                       | PFCs                  | health association       | (Lin et al. 2010)     |
| Perfluorooctanoic acid exposure is associated with elevated homocysteine and hypertension in US adults.                                                 | PFCs                  | health association       | (JY Min et al. 2012)  |
| Association between serum perfluorinated chemicals and thyroid function in U.S. adults: the National Health and Nutrition Examination Survey 2007-2010. | PFCs                  | health association       | (Wen et al. 2013)     |
| Positive association between perfluoroalkyl chemicals and hyperuricemia in children.                                                                    | PFCs                  | health association       | (Geiger et al. 2013)  |
| Medications as a source of human exposure to phthalates.                                                                                                | phthalates            | exposure assessment      | (Hauser et al. 2004)  |
| Urinary levels of seven phthalate metabolites in the U.S. population from the National Health and Nutrition Examination Survey (NHANES) 1999-2000.      | phthalates            | exposure assessment      | (Silva et al. 2004)   |

| <b>Publication title</b>                                                                                                                                  | <b>Chemical group</b> | <b>Analysis category</b> | <b>Reference</b>             |
|-----------------------------------------------------------------------------------------------------------------------------------------------------------|-----------------------|--------------------------|------------------------------|
| Internal phthalate exposure over the last two decades-a retrospective human biomonitoring study.                                                          | phthalates            | exposure assessment      | (Wittassek et al. 2007)      |
| Medications as a potential source of exposure to phthalates in the U.S. population.                                                                       | phthalates            | exposure assessment      | (Hernandez-Diaz et al. 2009) |
| A simple pharmacokinetic model to characterize exposure of Americans to di-2-ethylhexyl phthalate.                                                        | phthalates            | exposure assessment      | (Lorber et al. 2010)         |
| Dietary intake is associated with phthalate body burden in a nationally representative sample.                                                            | phthalates            | exposure assessment      | (Colacino et al. 2010)       |
| Selecting adequate exposure biomarkers of diisononyl and diisodecyl phthalates: data from the 2005-2006 National Health and Nutrition Examination Survey. | phthalates            | exposure assessment      | (Calafat et al. 2011)        |
| Socioeconomic factors and phthalate metabolite concentrations among United States women of reproductive age.                                              | phthalates            | exposure assessment      | (Kobrosly et al. 2012)       |
| Concentrations of urinary phthalate metabolites are associated with increased waist circumference and insulin resistance in adult U.S. males.             | phthalates            | health association       | (Stahlhut et al. 2007)       |
| Urinary phthalate metabolites in relation to biomarkers of inflammation and oxidative stress: NHANES 1999-2006.                                           | phthalates            | health association       | (Ferguson et al. 2011)       |
| Phthalate exposure and allergy in the U.S. population: results from NHANES 2005-2006.                                                                     | phthalates            | health association       | (Hoppin et al. 2013)         |



| <b>Publication title</b>                                                                                                                                                          | <b>Chemical group</b> | <b>Analysis category</b> | <b>Reference</b>        |
|-----------------------------------------------------------------------------------------------------------------------------------------------------------------------------------|-----------------------|--------------------------|-------------------------|
| Race/ethnicity-specific associations of urinary phthalates with childhood body mass in a nationally representative sample.                                                        | phthalates            | health association       | (Trasande et al. 2013a) |
| Urinary phthalates are associated with higher blood pressure in childhood.                                                                                                        | phthalates            | health association       | (Trasande et al. 2013c) |
| Urine phthalate concentrations are higher in people with stroke: United States National Health and Nutrition Examination Surveys (NHANES), 2001-2004.                             | phthalates            | health association       | (Shiue 2013)            |
| Reference range concentrations of N-acetyl-S-(2-hydroxyethyl)-L-cysteine, a common metabolite of several volatile organic compounds, in the urine of adults in the United States. | VOCs                  | exposure assessment      | (Calafat et al. 1999)   |
| Environmental exposure of commuters in Mexico City to volatile organic compounds as assessed by blood concentrations, 1998.                                                       | VOCs                  | exposure assessment      | (Lemire et al. 2004)    |
| Computational toxicology of chloroform: reverse dosimetry using Bayesian inference, Markov chain Monte Carlo simulation, and human biomonitoring data.                            | VOCs                  | exposure assessment      | (Lyons et al. 2008)     |
| Relationships between levels of volatile organic compounds in air and blood from the general population.                                                                          | VOCs                  | exposure assessment      | (Lin et al. 2008)       |
| Public health interpretation of trihalomethane blood levels in the United States: NHANES 1999-2004.                                                                               | VOCs                  | exposure assessment      | (Lakind et al. 2010)    |
| Impact of cigarette smoking on volatile organic compound (VOC) blood levels in the U.S. population: NHANES 2003-2004.                                                             | VOCs                  | exposure assessment      | (Chambers et al. 2011)  |

| <b>Publication title</b>                                                                                                    | <b>Chemical group</b> | <b>Analysis category</b> | <b>Reference</b>      |
|-----------------------------------------------------------------------------------------------------------------------------|-----------------------|--------------------------|-----------------------|
| Blood/air distribution of volatile organic compounds (VOCs) in a nationally representative sample.                          | VOCs                  | exposure assessment      | (Jia et al. 2012)     |
| Translational research to develop a human PBPK models tool kit-volatile organic compounds (VOCs).                           | VOCs                  | exposure assessment      | (Mumtaz et al. 2012)  |
| Volatile organic compounds and pulmonary function in the Third National Health and Nutrition Examination Survey, 1988-1994. | VOCs                  | health association       | (Elliott et al. 2006) |

BFRs, brominated flame retardants; PAHs, polycyclic aromatic hydrocarbons; PCBs, polychlorinated biphenyls; PFCs, perfluorinated compounds; VOCs, volatile organic compounds.

## References

- Adams SV, Passarelli MN, Newcomb PA. 2012. Cadmium exposure and cancer mortality in the Third National Health and Nutrition Examination Survey cohort. *Occup Environ Med* 69:153-156.
- Allen BC, Hack CE, Clewell HJ. 2007. Use of markov chain monte carlo analysis with a physiologically-based pharmacokinetic model of methylmercury to estimate exposures in US women of childbearing age. *Risk Anal* 27:947-959.
- Allen RH, Mage DT, Gondy G, Kodali A, Christensen C, Coble J, et al. 2006. Investigation of job-related pesticide exposure in the Third National Health and Nutrition Examination Survey. *Arch Environ Occup Health* 61:75-86.
- Amster ED, Cho JI, Christiani D. 2011. Urine arsenic concentration and obstructive pulmonary disease in the U.S. population. *J Toxicol Environ Health A* 74:716-727.
- Apostolou A, Garcia-Esquinas E, Fadrowski JJ, McLain P, Weaver VM, Navas-Acien A. 2012. Secondhand tobacco smoke: A source of lead exposure in US children and adolescents. *Am J Public Health* 102:714-722.
- Arora M, Weuve J, Schwartz J, Wright RO. 2009. Association of environmental cadmium exposure with periodontal disease in U.S. adults. *Environ Health Perspect* 117:739-744.
- Ballew C, Khan LK, Kaufmann R, Mokdad A, Miller DT, Gunter EW. 1999. Blood lead concentration and children's anthropometric dimensions in the Third National Health and Nutrition Examination Survey (NHANES III), 1988-1994. *J Pediatr* 134:623-630.
- Barr DB, Bravo R, Weerasekera G, Caltabiano LM, Whitehead RD, Jr., Olsson AO, et al. 2004. Concentrations of dialkyl phosphate metabolites of organophosphorus pesticides in the U.S. population. *Environ Health Perspect* 112:186-200.
- Barr DB, Allen R, Olsson AO, Bravo R, Caltabiano LM, Montesano A, et al. 2005. Concentrations of selective metabolites of organophosphorus pesticides in the United States population. *Environ Res* 99:314-326.
- Barr DB, Olsson AO, Wong LY, Udunka S, Baker SE, Whitehead RD, et al. 2010. Urinary concentrations of metabolites of pyrethroid insecticides in the general U.S. population: National Health and Nutrition Examination Survey 1999-2002. *Environ Health Perspect* 118:742-748.

- Barr DB, Wong LY, Bravo R, Weerasekera G, Odetokun M, Restrepo P, et al. 2011. Urinary concentrations of dialkylphosphate metabolites of organophosphorus pesticides: National Health and Nutrition Examination Survey 1999-2004. *Int J Environ Res Public Health* 8:3063-3098.
- Belova A, Greco SL, Riederer AM, Olsho LEW, Corrales MA. 2013. A method to screen U.S. environmental biomonitoring data for race/ethnicity and income-related disparity. *Environ Health* 12:114.
- Bernard SM, McGeehin MA. 2003. Prevalence of blood lead levels  $\geq 5$  micro g/dl among US children 1 to 5 years of age and socioeconomic and demographic factors associated with blood of lead levels 5 to 10 micro g/dl, Third National Health and Nutrition Examination Survey, 1988-1994. *Pediatrics* 112:1308-1313.
- Bhandari R, Xiao J, Shankar A. 2013. Urinary bisphenol A and obesity in U.S. children. *Am J Epidemiol* 177:1263-1270.
- Blount BC, Pirkle JL, Osterloh JD, Valentin-Blasini L, Caldwell KL. 2006. Urinary perchlorate and thyroid hormone levels in adolescent and adult men and women living in the United States. *Environ Health Perspect* 114:1865-1871.
- Blount BC, Valentin-Blasini L, Osterloh JD, Mauldin JP, Pirkle JL. 2007. Perchlorate exposure of the US population, 2001-2002. *J Expo Sci Environ Epidemiol* 17:400-407.
- Bouchard MF, Bellinger DC, Weuve J, Matthews-Bellinger J, Gilman SE, Wright RO, et al. 2009. Blood lead levels and major depressive disorder, panic disorder, and generalized anxiety disorder in US young adults. *Arch Gen Psychiatry* 66:1313-1319.
- Bouchard MF, Bellinger DC, Wright RO, Weisskopf MG. 2010. Attention-deficit/hyperactivity disorder and urinary metabolites of organophosphate pesticides. *Pediatrics* 125:E1270-E1277.
- Bradman A, Eskenazi B, Barr DB, Bravo R, Castorina R, Chevrier J, et al. 2005. Organophosphate urinary metabolite levels during pregnancy and after delivery in women living in an agricultural community. *Environ Health Perspect* 113:1802-1807.
- Braun JM, Kahn RS, Froehlich T, Auinger P, Lanphear BP. 2006. Exposures to environmental toxicants and attention deficit hyperactivity disorder in U.S. children. *Environ Health Perspect* 114:1904-1909.

- Braun JM, Froehlich TE, Daniels JL, Dietrich KN, Hornung R, Auinger P, et al. 2008. Association of environmental toxicants and conduct disorder in U.S. children: NHANES 2001-2004. *Environ Health Perspect* 116:956-962.
- Buettner C, Mukamal KJ, Gardiner P, Davis RB, Phillips RS, Mittleman MA. 2009. Herbal supplement use and blood lead levels of United States adults. *J Gen Intern Med* 24:1175-1182.
- Buttke DE, Sircar K, Martin C. 2012. Exposures to endocrine-disrupting chemicals and age of menarche in adolescent girls in NHANES (2003-2008). *Environ Health Perspect* 120:1613-1618.
- Calafat AM, Barr DB, Pirkle JL, Ashley DL. 1999. Reference range concentrations of n-acetyl-s-(2-hydroxyethyl)-l-cysteine, a common metabolite of several volatile organic compounds, in the urine of adults in the United States. *J Expo Anal Environ Epidemiol* 9:336-342.
- Calafat AM, Kuklennyik Z, Caudill SP, Reidy JA, Needham LL. 2006. Perfluorochemicals in pooled serum samples from United States residents in 2001 and 2002. *Environ Sci Technol* 40:2128-2134.
- Calafat AM, Kuklennyik Z, Reidy JA, Caudill SP, Tully JS, Needham LL. 2007a. Serum concentrations of 11 polyfluoroalkyl compounds in the U.S. population: Data from the National Health and Nutrition Examination Survey (NHANES). *Environ Sci Technol* 41:2237-2242.
- Calafat AM, Wong LY, Kuklennyik Z, Reidy JA, Needham LL. 2007b. Polyfluoroalkyl chemicals in the U.S. population: Data from the National Health and Nutrition Examination Survey (NHANES) 2003-2004 and comparisons with NHANES 1999-2000. *Environ Health Perspect* 115:1596-1602.
- Calafat AM, Wong LY, Ye X, Reidy JA, Needham LL. 2008a. Concentrations of the sunscreen agent benzophenone-3 in residents of the United States: National Health and Nutrition Examination Survey 2003-2004. *Environ Health Perspect* 116:893-897.
- Calafat AM, Ye X, Wong LY, Reidy JA, Needham LL. 2008b. Urinary concentrations of triclosan in the U.S. population: 2003-2004. *Environ Health Perspect* 116:303-307.
- Calafat AM, Ye X, Wong LY, Reidy JA, Needham LL. 2008c. Exposure of the U.S. population to bisphenol A and 4-tertiary-octylphenol: 2003-2004. *Environ Health Perspect* 116:39-44.

- Calafat AM, Ye X, Wong LY, Bishop AM, Needham LL. 2010. Urinary concentrations of four parabens in the U.S. population: NHANES 2005-2006. *Environ Health Perspect* 118:679-685.
- Calafat AM, Wong LY, Silva MJ, Samandar E, Preau JL, Jia LT, et al. 2011. Selecting adequate exposure biomarkers of diisononyl and diisodecyl phthalates: Data from the 2005-2006 National Health and Nutrition Examination Survey. *Environ Health Perspect* 119:50-55.
- Caldwell KL, Jones RL, Verdon CP, Jarrett JM, Caudill SP, Osterloh JD. 2009a. Levels of urinary total and speciated arsenic in the US population: National Health and Nutrition Examination Survey 2003-2004. *J Expo Sci Environ Epidemiol* 19:59-68.
- Caldwell KL, Mortensen ME, Jones RL, Caudill SP, Osterloh JD. 2009b. Total blood mercury concentrations in the U.S. population: 1999-2006. *Int J Hyg Environ Health* 212:588-598.
- Carrington CD, Bolger MP. 2002. An exposure assessment for methylmercury from seafood for consumers in the United States. *Risk Anal* 22:689-699.
- Carrington CD, Montwill B, Bolger PM. 2004. An intervention analysis for the reduction of exposure to methylmercury from the consumption of seafood by women of child-bearing age. *Regul Toxicol Pharm* 40:272-280.
- Carwile JL, Michels KB. 2011. Urinary bisphenol A and obesity: NHANES 2003-2006. *Environ Res* 111:825-830.
- Castorina R, Bradman A, Fenster L, Barr DB, Bravo R, Vedar MG, et al. 2010. Comparison of current-use pesticide and other toxicant urinary metabolite levels among pregnant women in the Chamacos cohort and NHANES. *Environ Health Perspect* 118:856-863.
- Caudill SP. 2011. Important issues related to using pooled samples for environmental chemical biomonitoring. *Stat Med* 30:515-521.
- Caudill SP. 2012. Use of pooled samples from the National Health and Nutrition Examination Survey. *Stat Med* 31:3269-3277.
- Cave M, Appana S, Patel M, Falkner KC, McClain CJ, Brock G. 2010. Polychlorinated biphenyls, lead, and mercury are associated with liver disease in American adults: NHANES 2003-2004. *Environ Health Perspect* 118:1735-1742.
- CDC. 2000. Blood lead levels in young children-United States and selected states, 1996-1999. *MMWR Morb Mortal Wkly Rep* 49:1133-1137.

- CDC. 2001. Blood and hair mercury levels in young children and women of childbearing age-United States, 1999. MMWR Morb Mortal Wkly Rep 50:140-143.
- CDC. 2004. Blood mercury levels in young children and childbearing-aged women-United States, 1999-2002. MMWR Morb Mortal Wkly Rep 53:1018-1020.
- CDC. 2005. Blood lead levels-United States, 1999-2002. MMWR Morb Mortal Wkly Rep 54:513-516.
- Chambers DM, Ocariz JM, McGuirk MF, Blount BC. 2011. Impact of cigarette smoking on volatile organic compound (VOC) blood levels in the U.S. population: NHANES 2003-2004. *Environ Int* 37:1321-1328.
- Chen AM, Kim SS, Chung E, Dietrich KN. 2013. Thyroid hormones in relation to lead, mercury, and cadmium exposure in the National Health and Nutrition Examination Survey, 2007-2008. *Environ Health Perspect* 121:181-186.
- Chen Q, Jiang X, Hedgeman E, Knutson K, Gillespie B, Hong B, et al. 2013. Estimation of age- and sex-specific background human serum concentrations of PCDDs, PCDFs, and PCBs in the UMDES and NHANES populations. *Chemosphere* 91:817-823.
- Choi YH, Hu H, Mukherjee B, Miller J, Park SK. 2012. Environmental cadmium and lead exposures and hearing loss in U.S. adults: The National Health and Nutrition Examination Survey, 1999 to 2004. *Environ Health Perspect* 120:1544-1550.
- Choudhury H, Harvey T, Thayer WC, Lockwood TF, Stiteler WM, Goodrum PE, et al. 2001. Urinary cadmium elimination as a biomarker of exposure for evaluating a cadmium dietary exposure-biokinetics model. *J Toxicol Environ Health A* 63:321-350.
- Christensen KLY, Lorber M, Koch HM, Kolossa-Gehring M, Morgan MK. 2012. Population variability of phthalate metabolites and bisphenol A concentrations in spot urine samples versus 24-or 48-h collections. *J Expo Sci Environ Epidemiol* 22:632-640.
- Christensen KLY. 2013. Metals in blood and urine, and thyroid function among adults in the United States 2007-2008. *Int J Hyg Environ Health* 216:624-632.
- Ciesielski T, Weuve J, Bellinger DC, Schwartz J, Lanphear B, Wright RO. 2012. Cadmium exposure and neurodevelopmental outcomes in U.S. children. *Environ Health Perspect* 120:758-763.

- Ciesielski T, Bellinger DC, Schwartz J, Hauser R, Wright RO. 2013. Associations between cadmium exposure and neurocognitive test scores in a cross-sectional study of US adults. *Environ Health* 12:13.
- Clayton EMR, Todd M, Dowd JB, Aiello AE. 2011. The impact of bisphenol A and triclosan on immune parameters in the U.S. population, NHANES 2003-2006. *Environ Health Perspect* 119:390-396.
- Clune AL, Ryan PB, Barr DB. 2012. Have regulatory efforts to reduce organophosphorus insecticide exposures been effective? *Environ Health Perspect* 120:521-525.
- Colacino JA, Harris TR, Schechter A. 2010. Dietary intake is associated with phthalate body burden in a nationally representative sample. *Environ Health Perspect* 118:998-1003.
- Crinnion WJ. 2010. The CDC fourth national report on human exposure to environmental chemicals: What it tells us about our toxic burden and how it assist environmental medicine physicians. *Altern Med Rev* 15:101-109.
- Davis MA, Mackenzie TA, Cottingham KL, Gilbert-Diamond D, Punshon T, Karagas MR. 2012. Rice consumption and urinary arsenic concentrations in U.S. children. *Environ Health Perspect* 120:1418-1424.
- Dixon SL, Gaitens JM, Jacobs DE, Strauss W, Nagaraja J, Pivetz T, et al. 2009. Exposure of U.S. children to residential dust lead, 1999-2004: II. The contribution of lead-contaminated dust to children's blood lead levels. *Environ Health Perspect* 117:468-474.
- Dye BA, Hirsch R, Brody DJ. 2002. The relationship between blood lead levels and periodontal bone loss in the United States, 1988-1994. *Environ Health Perspect* 110:997-1002.
- Dye BA, Schober SE, Dillon CF, Jones RL, Fryar C, McDowell M, et al. 2005. Urinary mercury concentrations associated with dental restorations in adult women aged 16-49 years: United States, 1999-2000. *Occup Environ Med* 62:368-375.
- Elliott L, Longnecker MP, Kissling GE, London SJ. 2006. Volatile organic compounds and pulmonary function in the Third National Health and Nutrition Examination Survey, 1988-1994. *Environ Health Perspect* 114:1210-1214.
- Eng DS, Lee JM, Gebremariam A, Meeker JD, Peterson K, Padmanabhan V. 2013. Bisphenol A and chronic disease risk factors in US children. *Pediatrics* 132:e637-645.



- English P, Blount B, Wong M, Copan L, Olmedo L, Patton S, et al. 2011. Direct measurement of perchlorate exposure biomarkers in a highly exposed population: A pilot study. *PLoS One* 6:e17015.
- Everett CJ, King DE, Player MS, Matheson EM, Post RE, Mainous AG, 3rd. 2010. Association of urinary polycyclic aromatic hydrocarbons and serum c-reactive protein. *Environ Res* 110:79-82.
- Fadrowski JJ, Navas-Acien A, Tellez-Plaza M, Guallar E, Weaver VM, Furth SL. 2010. Blood lead level and kidney function in US adolescents: The Third National Health and Nutrition Examination Survey. *Arch Intern Med* 170:75-82.
- Faramawi MF, Liu YC, Caffrey JL, Lin YS, Gandhi S, Singh KP. 2012. The association between urinary cadmium and frontal t wave axis deviation in the US adults. *Int J Hyg Environ Health* 215:406-410.
- Fenske RA, Lu CS, Curl CL, Shirai JH, Kissel JC. 2005. Biologic monitoring to characterize organophosphorus pesticide exposure among children and workers: An analysis of recent studies in Washington State. *Environ Health Perspect* 113:1651-1657.
- Ferguson KK, Loch-Caruso R, Meeker JD. 2011. Urinary phthalate metabolites in relation to biomarkers of inflammation and oxidative stress: NHANES 1999-2006. *Environ Res* 111:718-726.
- Ferraro PM, Costanzi S, Naticchia A, Sturniolo A, Gambaro G. 2010. Low level exposure to cadmium increases the risk of chronic kidney disease: Analysis of the NHANES 1999-2006. *BMC public health* 10:304.
- Ferraro PM, Sturniolo A, Naticchia A, D'Alonzo S, Gambaro G. 2012. Temporal trend of cadmium exposure in the United States population suggests gender specificities. *Intern Med J* 42:691-697.
- Ferriby LL, Knutsen JS, Harris M, Unice KM, Scott P, Nony P, et al. 2007. Evaluation of PCDD/F and dioxin-like PCB serum concentration data from the 2001-2002 National Health and Nutrition Examination Survey of the United States population. *J Expo Sci Environ Epidemiol* 17:358-371.
- Ford ES. 1999. Serum magnesium and ischaemic heart disease: Findings from a national sample of US adults. *Int J Epidemiol* 28:645-651.

- Ford ES. 2000. Serum copper concentration and coronary heart disease among US adults. *Am J Epidemiol* 151:1182-1188.
- Fortenberry GZ, Hu H, Turyk M, Barr DB, Meeker JD. 2012. Association between urinary 3, 5, 6-trichloro-2-pyridinol, a metabolite of chlorpyrifos and chlorpyrifos-methyl, and serum T4 and TSH in NHANES 1999-2002. *Sci Total Environ* 424:351-355.
- Fraser AJ, Webster TF, McClean MD. 2009. Diet contributes significantly to the body burden of PBDEs in the general US population. *Environ Health Perspect* 117:1520-1525.
- Froehlich TE, Lanphear BP, Auinger P, Hornung R, Epstein JN, Braun J, et al. 2009. Association of tobacco and lead exposures with attention-deficit/hyperactivity disorder. *Pediatrics* 124:e1054-1063.
- Gallagher CM, Kovach JS, Meliker JR. 2008. Urinary cadmium and osteoporosis in U.S. women  $\geq$  50 years of age: NHANES 1988-1994 and 1999-2004. *Environ Health Perspect* 116:1338-1343.
- Gallagher CM, Chen JJ, Kovach JS. 2010a. Environmental cadmium and breast cancer risk. *Aging (Albany NY)* 2:804-814.
- Gallagher CM, Moonga BS, Kovach JS. 2010b. Cadmium, follicle-stimulating hormone, and effects on bone in women age 42-60 years, NHANES III. *Environ Res* 110:105-111.
- Gallagher CM, Meliker JR. 2011. Total blood mercury, plasma homocysteine, methylmalonic acid and folate in US children aged 3-5 years, NHANES 1999-2004. *Sci Total Environ* 409:1399-1405.
- Gallagher CM, Smith DM, Meliker JR. 2011. Total blood mercury and serum measles antibodies in US children, NHANES 2003-2004. *Sci Total Environ* 410-411:65-71.
- Gallagher CM, Meliker JR. 2012. Mercury and thyroid autoantibodies in U.S. women, NHANES 2007-2008. *Environ Int* 40:39-43.
- Gallagher CM, McElroy AE, Smith DM, Golightly MG, Meliker JR. 2013a. Polychlorinated biphenyls, mercury, and antinuclear antibody positivity, NHANES 2003-2004. *Int J Hyg Environ Health* 216:721-727.
- Gallagher CM, Smith DM, Golightly MG, Meliker JR. 2013b. Total blood mercury and rubella antibody concentrations in US children aged 6-11 years, NHANES 2003-2004. *Sci Total Environ* 442:48-55.

- Geiger SD, Xiao J, Shankar A. 2013. Positive association between perfluoroalkyl chemicals and hyperuricemia in children. *Am J Epidemiol* 177:1255-1262.
- Gollenberg AL, Hediger ML, Lee PA, Himes JH, Louis GMB. 2010. Association between lead and cadmium and reproductive hormones in peripubertal U.S. girls. *Environ Health Perspect* 118:1782-1787.
- Golub NI, Winters PC, van Wijngaarden E. 2010. A population-based study of blood lead levels in relation to depression in the United States. *Int Arch Occup Environ Health* 83:771-777.
- Goodrich JM, Wang Y, Gillespie B, Werner R, Franzblau A, Basu N. 2013. Methylmercury and elemental mercury differentially associate with blood pressure among dental professionals. *Int J Hyg Environ Health* 216:195-201.
- Grainger J, Huang W, Patterson DG, Jr., Turner WE, Pirkle J, Caudill SP, et al. 2006. Reference range levels of polycyclic aromatic hydrocarbons in the US population by measurement of urinary monohydroxy metabolites. *Environ Res* 100:394-423.
- Grosse SD, Matte TD, Schwartz J, Jackson RJ. 2002. Economic gains resulting from the reduction in children's exposure to lead in the United States. *Environ Health Perspect* 110:563-569.
- Hauser R, Duty S, Godfrey-Bailey L, Calafat AM. 2004. Medications as a source of human exposure to phthalates. *Environ Health Perspect* 112:751-753.
- Hernandez-Diaz S, Mitchell AA, Kelley KE, Calafat AM, Hauser R. 2009. Medications as a potential source of exposure to phthalates in the US population. *Environ Health Perspect* 117:185-189.
- Hoffman K, Webster TF, Weisskopf MG, Weinberg J, Vieira VM. 2010. Exposure to polyfluoroalkyl chemicals and attention deficit/hyperactivity disorder in U.S. children 12-15 years of age. *Environ Health Perspect* 118:1762-1767.
- Hoppin JA, Jaramillo R, London SJ, Bertelsen RJ, Salo PM, Sandler DP, et al. 2013. Phthalate exposure and allergy in the U.S. population: Results from NHANES 2005-2006. *Environ Health Perspect* 121:1129-1134.
- Hsu JY, Small DS. 2013. Calibrating sensitivity analyses to observed covariates in observational studies. *Biometrics* 69:803-811.

- Huang W, Caudill SP, Grainger J, Needham LL, Patterson DG, Jr. 2006. Levels of 1-hydroxypyrene and other monohydroxy polycyclic aromatic hydrocarbons in children: A study based on U.S. reference range values. *Toxicol Lett* 163:10-19.
- Huang WL, Grainger J, Patterson DG, Turner WE, Caudill SP, Needham LL, et al. 2004. Comparison of 1-hydroxypyrene exposure in the US population with that in occupational exposure studies. *Int Arch Occup Environ Health* 77:491-498.
- Huber DR, Blount BC, Mage DT, Letkiewicz FJ, Kumar A, Allen RH. 2011. Estimating perchlorate exposure from food and tap water based on US biomonitoring and occurrence data. *J Expo Sci Environ Epidemiol* 21:395-407.
- Hyder O, Chung M, Cosgrove D, Herman JM, Li ZP, Firoozmand A, et al. 2013. Cadmium exposure and liver disease among US adults. *J Gastrointest Surg* 17:1265-1273.
- Iqbal S, Muntner P, Batuman V, Rabito FA. 2008. Estimated burden of blood lead levels 5 microg/dl in 1999-2002 and declines from 1988 to 1994. *Environ Res* 107:305-311.
- Jacobs DE, Nevin R. 2006. Validation of a 20-year forecast of US childhood lead poisoning: Updated prospects for 2010. *Environ Res* 102:352-364.
- Jain RB, Wang RY. 2010. Regression models to estimate total polychlorinated biphenyls in the general US population: 2001-2002 and 2003-2004. *Chemosphere* 79:243-252.
- Jain RB, Wang RY. 2011. Association of caffeine consumption and smoking status with the serum concentrations of polychlorinated biphenyls, dioxins, and furans in the general U.S. population: NHANES 2003-2004. *J Toxicol Environ Health A* 74:1225-1239.
- Jain RB. 2013. Effect of pregnancy on the levels of selected perfluoroalkyl compounds for females aged 17-39 years: Data from National Health and Nutrition Examination Survey 2003-2008. *J Toxicol Environ Health A* 76:409-421.
- Jemal A, Graubard BI, Devesa SS, Flegal KM. 2002. The association of blood lead level and cancer mortality among whites in the United States. *Environ Health Perspect* 110:325-329.
- Jerschow E, McGinn AP, de Vos G, Vernon N, Jariwala S, Hudes G, et al. 2012. Dichlorophenol-containing pesticides and allergies: Results from the US National Health and Nutrition Examination Survey 2005-2006. *Ann Allergy Asthma Immunol* 109:420-425.
- Ji JS, Elbaz A, Weisskopf MG. 2013. Association between blood lead and walking speed in the National Health and Nutrition Examination Survey (NHANES 1999-2002). *Environ Health Perspect* 121:711-716.

- Jia C, Yu X, Masiak W. 2012. Blood/air distribution of volatile organic compounds (VOCs) in a nationally representative sample. *Sci Total Environ* 419:225-232.
- Jones L, Parker JD, Mendola P. 2010. Blood lead and mercury levels in pregnant women in the United States, 2003-2008. *NCHS data brief*:1-8.
- Jones MR, Tellez-Plaza M, Sharrett AR, Guallar E, Navas-Acien A. 2011. Urine arsenic and hypertension in US adults: The 2003-2008 National Health and Nutrition Examination Survey. *Epidemiology* 22:153-161.
- Jones RL, Homa DM, Meyer PA, Brody DJ, Caldwell KL, Pirkle JL, et al. 2009. Trends in blood lead levels and blood lead testing among US children aged 1 to 5 years, 1988-2004. *Pediatrics* 123:e376-e385.
- Kato K, Calafat AM, Wong LY, Wanigatunga AA, Caudill SP, Needham LL. 2009. Polyfluoroalkyl compounds in pooled sera from children participating in the National Health and Nutrition Examination Survey 2001-2002. *Environ Sci Technol* 43:2641-2647.
- Kato K, Wong LY, Jia LT, Kuklenyik Z, Calafat AM. 2011. Trends in exposure to polyfluoroalkyl chemicals in the U.S. population: 1999-2008. *Environ Sci Technol* 45:8037-8045.
- Kaufmann RB, Clouse TL, Olson DR, Matte TD. 2000. Elevated blood lead levels and blood lead screening among US children aged one to five years: 1988-1994. *Pediatrics* 106.
- Kieszak SM, Naeher LP, Rubin CS, Needham LL, Backer L, Barr D, et al. 2002. Investigation of the relation between self-reported food consumption and household chemical exposures with urinary levels of selected nonpersistent pesticides. *J Expo Anal Environ Epidemiol* 12:404-408.
- Kobrosly RW, Parlett LE, Stahlhut RW, Barrett ES, Swan SH. 2012. Socioeconomic factors and phthalate metabolite concentrations among United States women of reproductive age. *Environ Res* 115:11-17.
- Koeppe ES, Ferguson KK, Colacino JA, Meeker JD. 2013. Relationship between urinary triclosan and paraben concentrations and serum thyroid measures in NHANES 2007-2008. *Sci Total Environ* 445:299-305.
- Lacher DA, Hughes JP, Carroll MD. 2010. Biological variation of laboratory analytes based on the 1999-2002 National Health and Nutrition Examination Survey. *Natl Health Stat Report* 1-7.

- Lakind JS, Naiman DQ. 2008. Bisphenol A (BPA) daily intakes in the United States: Estimates from the 2003-2004 NHANES urinary BPA data. *J Expo Sci Environ Epidemiol* 18:608-615.
- LaKind JS, Hays SM, Aylward LL, Naiman DQ. 2009. Perspective on serum dioxin levels in the United States: An evaluation of the NHANES data. *J Expo Sci Environ Epidemiol* 19:435-441.
- Lakind JS, Naiman DQ, Hays SM, Aylward LL, Blount BC. 2010. Public health interpretation of trihalomethane blood levels in the United States: NHANES 1999-2004. *J Expo Sci Environ Epidemiol* 20:255-262.
- Lakind JS, Naiman DQ. 2011. Daily intake of bisphenol A and potential sources of exposure: 2005-2006 National Health and Nutrition Examination Survey. *J Expo Sci Environ Epidemiol* 21:272-279.
- LaKind JS, Levesque J, Dumas P, Bryan S, Clarke J, Naiman DQ. 2012. Comparing United States and Canadian population exposures from national biomonitoring surveys: Bisphenol A intake as a case study. *J Expo Sci Environ Epidemiol* 22:219-226.
- Laks DR. 2009. Assessment of chronic mercury exposure within the U.S. population, National Health and Nutrition Examination Survey, 1999-2006. *Biometals* 22:1103-1114.
- Lang IA, Galloway TS, Scarlett A, Henley WE, Depledge M, Wallace RB, et al. 2008. Association of urinary bisphenol A concentration with medical disorders and laboratory abnormalities in adults. *J Am Med Assoc* 300:1303-1310.
- Lanphear BP, Dietrich K, Auinger P, Cox C. 2000. Cognitive deficits associated with blood lead concentrations <10 microg/dl in US children and adolescents. *Public Health Rep* 115:521-529.
- Lau FK, deCastro BR, Mills-Herring L, Tao L, Valentin-Blasini L, Alwis KU, et al. 2013. Urinary perchlorate as a measure of dietary and drinking water exposure in a representative sample of the United States population 2001-2008. *J Expo Sci Environ Epidemiol* 23:207-214.
- Lee DH, Lim JS, Song K, Boo Y, Jacobs DR, Jr. 2006. Graded associations of blood lead and urinary cadmium concentrations with oxidative-stress-related markers in the U.S. population: Results from the Third National Health and Nutrition Examination Survey. *Environ Health Perspect* 114:350-354.

- Lee DH, Lee IK, Jin SH, Steffes M, Jacobs DR, Jr. 2007a. Association between serum concentrations of persistent organic pollutants and insulin resistance among nondiabetic adults: Results from the National Health and Nutrition Examination Survey 1999-2002. *Diabetes Care* 30:622-628.
- Lee DH, Lee IK, Porta M, Steffes M, Jacobs DR. 2007b. Relationship between serum concentrations of persistent organic pollutants and the prevalence of metabolic syndrome among non-diabetic adults: Results from the National Health and Nutrition Examination Survey 1999-2002. *Diabetologia* 50:1841-1851.
- Lee MG, Chun OK, Song WO. 2005. Determinants of the blood lead level of US women of reproductive age. *J Am Coll Nutr* 24:1-9.
- Lee YM, Lee MK, Bae SG, Lee SH, Kim SY, Lee DH. 2012. Association of homocysteine levels with blood lead levels and micronutrients in the US general population. *J Prev Med Public Health* 45:387-393.
- Lee YM, Bae SG, Lee SH, Jacobs DR, Jr., Lee DH. 2013. Persistent organic pollutants and hyperuricemia in the U.S. general population. *Atherosclerosis* 230:1-5.
- Lemire S, Ashley D, Olaya P, Romieu I, Welch S, Meneses-Gonzalez F, et al. 2004. Environmental exposure of commuters in Mexico City to volatile organic compounds as assessed by blood concentrations, 1998. *Salud Publica Mex* 46:32-38.
- Li Z, Sandau CD, Romanoff LC, Caudill SP, Sjodin A, Needham LL, et al. 2008. Concentration and profile of 22 urinary polycyclic aromatic hydrocarbon metabolites in the US population. *Environ Res* 107:320-331.
- Lim JS, Lee DH, Jacobs DR, Jr. 2008. Association of brominated flame retardants with diabetes and metabolic syndrome in the U.S. population, 2003-2004. *Diabetes Care* 31:1802-1807.
- Lin CY, Lin LY, Chiang CK, Wang WJ, Su YN, Hung KY, et al. 2010. Investigation of the associations between low-dose serum perfluorinated chemicals and liver enzymes in US adults. *Am J Gastroenterol* 105:1354-1363.
- Lin YS, Egeghy PP, Rappaport SM. 2008. Relationships between levels of volatile organic compounds in air and blood from the general population. *J Expo Sci Environ Epidemiol* 18:421-429.
- Lorber M, Patterson D, Huwe J, Kahn H. 2009. Evaluation of background exposures of Americans to dioxin-like compounds in the 1990s and the 2000s. *Chemosphere* 77:640-651.

- Lorber M, Angerer J, Koch HM. 2010. A simple pharmacokinetic model to characterize exposure of Americans to di-2-ethylhexyl phthalate. *J Expo Sci Environ Epidemiol* 20:38-53.
- Lustberg M, Silbergeld E. 2002. Blood lead levels and mortality. *Arch Intern Med* 162:2443-2449.
- Lyons MA, Yang RSH, Mayeno AN, Reisfeld B. 2008. Computational toxicology of chloroform: Reverse dosimetry using bayesian inference, markov chain monte carlo simulation, and human biomonitoring data. *Environ Health Perspect* 116:1040-1046.
- Macek MD, Matte TD, Sinks T, Malvitz DM. 2006. Blood lead concentrations in children and method of water fluoridation in the United States, 1988-1994. *Environ Health Perspect* 114:130-134.
- Mage DT, Allen RH, Gondy G, Smith W, Barr DB, Needham LL. 2004. Estimating pesticide dose from urinary pesticide concentration data by creatinine correction in the Third National Health and Nutrition Examination Survey (NHANES-III). *J Expo Anal Environ Epidemiol* 14:457-465.
- Mahaffey KR, Clickner RP, Bodurow CC. 2004. Blood organic mercury and dietary mercury intake: National Health and Nutrition Examination Survey, 1999 and 2000. *Environ Health Perspect* 112:562-570.
- Mahaffey KR. 2005. Mercury exposure: Medical and public health issues. *Trans Am Clin Climatol Assoc* 116:127-153; discussion 153-124.
- Mahaffey KR, Clickner RP, Jeffries RA. 2008. Methylmercury and omega-3 fatty acids: Co-occurrence of dietary sources with emphasis on fish and shellfish. *Environ Res* 107:20-29.
- Mahaffey KR, Clickner RP, Jeffries RA. 2009. Adult women's blood mercury concentrations vary regionally in the United States: Association with patterns of fish consumption (NHANES 1999-2004). *Environ Health Perspect* 117:47-53.
- Mannino DM, Albalak R, Grosse S, Repace J. 2003. Second-hand smoke exposure and blood lead levels in U.S. children. *Epidemiology* 14:719-727.
- Mannino DM, Holguin F, Greves HM, Savage-Brown A, Stock AL, Jones RL. 2004. Urinary cadmium levels predict lower lung function in current and former smokers: Data from the Third National Health and Nutrition Examination Survey. *Thorax* 59:194-198.



- Mannino DM, Homa DM, Matte T, Hernandez-Avila M. 2005. Active and passive smoking and blood lead levels in U.S. adults: Data from the Third National Health and Nutrition Examination Survey. *Nicotine Tob Res* 7:557-564.
- Marchitti SA, LaKind JS, Naiman DQ, Berlin CM, Kenneke JF. 2013. Improving infant exposure and health risk estimates: Using serum data to predict polybrominated diphenyl ether concentrations in breast milk. *Environ Sci Technol* 47:4787-4795.
- McKone TE, Castorina R, Harnly ME, Kuwabara Y, Eskenazi B, Bradman A. 2007. Merging models and biomonitoring data to characterize sources and pathways of human exposure to organophosphorus pesticides in the Salinas Valley of California. *Environ Sci Technol* 41:3233-3240.
- Meeker JD, Ferguson KK. 2011. Relationship between urinary phthalate and bisphenol A concentrations and serum thyroid measures in US adults and adolescents from the National Health and Nutrition Examination Survey (NHANES) 2007-2008. *Environ Health Perspect* 119:1396-1402.
- Melzer D, Rice N, Depledge MH, Henley WE, Galloway TS. 2010a. Association between serum perfluorooctanoic acid (PFOA) and thyroid disease in the US National Health and Nutrition Examination Survey. *Environ Health Perspect* 118:686-692.
- Melzer D, Rice NE, Lewis C, Henley WE, Galloway TS. 2010b. Association of urinary bisphenol A concentration with heart disease: Evidence from NHANES 2003/06. *PLoS One* 5: e8673
- Mendez W, Dederick E, Cohen J. 2010. Drinking water contribution to aggregate perchlorate intake of reproductive-age women in the United States estimated by dietary intake simulation and analysis of urinary excretion data. *J Expo Sci Environ Epidemiol* 20:288-297.
- Mendola P, Brett K, DiBari JN, Pollack AZ, Tandon R, Shenassa ED. 2013. Menopause and lead body burden among US women aged 45-55, NHANES 1999-2010. *Environ Res* 121:110-113.
- Mendy A, Gasana J, Vieira ER. 2012. Urinary heavy metals and associated medical conditions in the US adult population. *Int J Environ Health Res* 22:105-118.
- Menke A, Muntner P, Batuman V, Silbergeld EK, Guallar E. 2006. Blood lead below 0.48 micromol/l (10 microg/dl) and mortality among US adults. *Circulation* 114:1388-1394.

- Menke A, Guallar E, Shiels MS, Rohrmann S, Basaria S, Rifai N, et al. 2008. The association of urinary cadmium with sex steroid hormone concentrations in a general population sample of US adult men. *BMC Public Health* 8:72.
- Menke A, Muntner P, Silbergeld EK, Platz EA, Guallar E. 2009. Cadmium levels in urine and mortality among US adults. *Environ Health Perspect* 117:190-196.
- Meyer PA, Pivetz T, Dignam TA, Homa DM, Schoonover J, Brody D, et al. 2003. Surveillance for elevated blood lead levels among children-United States, 1997-2001. *MMWR Surveill Summ* 52:1-21.
- Mijal RS, Holzman CB. 2010. Blood cadmium levels in women of childbearing age vary by race/ethnicity. *Environ Res* 110:505-512.
- Miller RL, Garfinkel R, Lendor C, Hoepner L, Li Z, Romanoff L, et al. 2010. Polycyclic aromatic hydrocarbon metabolite levels and pediatric allergy and asthma in an inner-city cohort. *Pediatr Allergy Immunol* 21:260-267.
- Min JY, Lee KJ, Park JB, Min KB. 2012. Perfluorooctanoic acid exposure is associated with elevated homocysteine and hypertension in US adults. *Occup Environ Med* 69:658-662.
- Min JY, Min KB. 2013. Association between total blood mercury and exhaled nitric oxide in US adults. *Nitric Oxide* 29:53-58.
- Min KB, Lee KJ, Park JB, Min JY. 2012. Lead and cadmium levels and balance and vestibular dysfunction among adult participants in the National Health and Nutrition Examination Survey (NHANES) 1999-2004. *Environ Health Perspect* 120:413-417.
- Morales LS, Gutierrez P, Escargue JJ. 2005. Demographic and socioeconomic factors associated with blood lead levels among Mexican-American children and adolescents in the United States. *Public Health Rep* 120:448-454.
- Mortensen ME, Wong LY, Osterloh JD. 2011. Smoking status and urine cadmium above levels associated with subclinical renal effects in U.S. adults without chronic kidney disease. *Int J Hyg Environ Health* 214:305-310.
- Moss ME, Lanphear BP, Auinger P. 1999. Association of dental caries and blood lead levels. *JAMA* 281:2294-2298.
- Muennig P, Song XY, Payne-Sturges DC, Gee GC. 2011. Blood and urine levels of long half-life toxicants by nativity among immigrants to the United States. *Sci Total Environ* 412:109-113.

- Mumtaz MM, Ray M, Crowell SR, Keys D, Fisher J, Ruiz P. 2012. Translational research to develop a human pbpk models tool kit-volatile organic compounds (VOCs). *J Toxicol Environ Health A* 75:6-24.
- Muntner P, He J, Vupputuri S, Coresh J, Batuman V. 2003. Blood lead and chronic kidney disease in the general United States population: Results from NHANES III. *Kidney Int* 63:1044-1050.
- Muntner P, Menke A, DeSalvo KB, Rabito FA, Batuman V. 2005. Continued decline in blood lead levels among adults in the United States - the National Health and Nutrition Examination Surveys. *Arch Intern Med* 165:2155-2161.
- Naeher LP, Tolve NS, Egeghy PP, Barr DB, Adetona O, Fortmann RC, et al. 2010. Organophosphorus and pyrethroid insecticide urinary metabolite concentrations in young children living in a southeastern United States city. *Sci Total Environ* 408:1145-1153.
- Nahar MS, Soliman AS, Colacino JA, Calafat AM, Battige K, Hablas A, et al. 2012. Urinary bisphenol A concentrations in girls from rural and urban Egypt: A pilot study. *Environ Health* 11:20.
- Nash D, Magder L, Lustberg M, Sherwin RW, Rubin RJ, Kaufmann RB, et al. 2003. Blood lead, blood pressure, and hypertension in perimenopausal and postmenopausal women. *JAMA* 289:1523-1532.
- Nash D, Magder LS, Sherwin R, Rubin RJ, Silbergeld EK. 2004. Bone density-related predictors of blood lead level among peri- and postmenopausal women in the United States - the Third National Health and Nutrition Examination Survey, 1988-1994. *Am J Epidemiol* 160:901-911.
- Naufal ZS, Marano KM, Kathman SJ, Wilson CL. 2011. Differential exposure biomarker levels among cigarette smokers and smokeless tobacco consumers in the National Health and Nutrition Examination Survey 1999-2008. *Biomarkers* 16:222-234.
- Navas-Acien A, Selvin E, Sharrett AR, Calderon-Aranda E, Silbergeld E, Guallar E. 2004. Lead, cadmium, smoking, and increased risk of peripheral arterial disease. *Circulation* 109:3196-3201.
- Navas-Acien A, Silbergeld EK, Sharrett R, Calderon-Aranda E, Selvin E, Guallar E. 2005. Metals in urine and peripheral arterial disease. *Environ Health Perspect* 113:164-169.

- Navas-Acien A, Silbergeld EK, Pastor-Barriuso R, Guallar E. 2008. Arsenic exposure and prevalence of type 2 diabetes in US adults. *JAMA* 300:814-822.
- Navas-Acien A, Tellez-Plaza M, Guallar E, Muntner P, Silbergeld E, Jaar B, et al. 2009. Blood cadmium and lead and chronic kidney disease in US adults: A joint analysis. *Am J Epidemiol* 170:1156-1164.
- Navas-Acien A, Francesconi KA, Silbergeld EK, Guallar E. 2011. Seafood intake and urine concentrations of total arsenic, dimethylarsinate and arsenobetaine in the US population. *Environ Res* 111:110-118.
- Nelson JW, Hatch EE, Webster TF. 2010. Exposure to polyfluoroalkyl chemicals and cholesterol, body weight, and insulin resistance in the general U.S. population. *Environ Health Perspect* 118:197-202.
- Nelson JW, Scammell MK, Hatch EE, Webster TF. 2012. Social disparities in exposures to bisphenol A and polyfluoroalkyl chemicals: A cross-sectional study within NHANES 2003-2006. *Environ Health* 11:10.
- Ng THH, Mossey JM, Lee BK. 2013. Total blood mercury levels and depression among adults in the United States: National Health and Nutrition Examination Survey 2005-2008. *PLoS One* 8: e79339.
- Nichols BR, Hentz KL, Aylward L, Hays SM, Lamb JC. 2007. Age-specific reference ranges for polychlorinated biphenyls (PCB) based on the NHANES 2001-2002 survey. *J Toxicol Environ Health A* 70:1873-1877.
- Park SK, Lee S, Basu N, Franzblau A. 2013. Associations of blood and urinary mercury with hypertension in U.S. adults: The NHANES 2003-2006. *Environ Res* 123:25-32.
- Paschal DC, Burt V, Caudill SP, Gunter EW, Pirkle JL, Sampson EJ, et al. 2000. Exposure of the U.S. population aged 6 years and older to cadmium: 1988-1994. *Arch Environ Contam Toxicol* 38:377-383.
- Patel CJ, Cullen MR, Ioannidis JPA, Butte AJ. 2012. Systematic evaluation of environmental factors: Persistent pollutants and nutrients correlated with serum lipid levels. *Int J Epidemiol* 41:828-843.

- Patel CJ, Rehkopf DH, Leppert JT, Bortz WM, Cullen MR, Chertow GM, et al. 2013. Systematic evaluation of environmental and behavioural factors associated with all-cause mortality in the United States National Health and Nutrition Examination Survey. *Int J Epidemiol* 42:1795-1810.
- Patel CJ, Yang T, Hu ZK, Wen QJ, Sung J, El-Sayed YY, et al. 2014. Investigation of maternal environmental exposures in association with self-reported preterm birth. *Reprod Toxicol* 45:1-7.
- Payne-Sturges D, Cohen J, Castorina R, Axelrad DA, Woodruff TJ. 2009. Evaluating cumulative organophosphorus pesticide body burden of children: A national case study. *Environ Sci Technol* 43:7924-7930.
- Quandt SA, Jones BT, Talton JW, Whalley LE, Galvan L, Vallejos QM, et al. 2010. Heavy metals exposures among Mexican farmworkers in eastern North Carolina. *Environ Res* 110:83-88.
- Rajkumar WS, Manohar J, Doon R, Siung-Chang A, Chang-Yen I, Monteil M. 2006. Blood lead levels in primary school children in Trinidad and Tobago. *Sci Total Environ* 361:81-87.
- Richmond-Bryant J, Meng QY, Davis JA, Cohen J, Svendsgaard D, Brown JS, et al. 2013. A multi-level model of blood lead as a function of air lead. *Sci Total Environ* 461:207-213.
- Richter PA, Bishop EE, Wang J, Swahn MH. 2009. Tobacco smoke exposure and levels of urinary metals in the U.S. youth and adult population: The National Health and Nutrition Examination Survey (NHANES) 1999-2004. *Int J Environ Res Public Health* 6:1930-1946.
- Richter PA, Bishop EE, Wang JT, Kaufmann R. 2013. Trends in tobacco smoke exposure and blood lead levels among youths and adults in the United States: The National Health and Nutrition Examination Survey, 1999-2008. *Prev Chronic Dis* 10: E213.
- Riederer AM, Bartell SM, Barr DB, Ryan PB. 2008. Diet and nondiet predictors of urinary 3-phenoxybenzoic acid in NHANES 1999-2002. *Environ Health Perspect* 116:1015-1022.
- Riederer AM, Belova A, George BJ, Anastas PT. 2013. Urinary cadmium in the 1999-2008 U.S. National Health and Nutrition Examination Survey (NHANES). *Environ Sci Technol* 47:1137-1147.
- Rokadia HK, Agarwal S. 2013. Serum heavy metals and obstructive lung disease results from the National Health and Nutrition Examination Survey. *Chest* 143:388-397.

- Rubin C, Esteban E, Kieszak S, Hill RH, Jr., Dunlop B, Yacovac R, et al. 2002. Assessment of human exposure and human health effects after indoor application of methyl parathion in Lorain County, Ohio, 1995-1996. *Environ Health Perspect* 110 Suppl 6:1047-1051.
- Ruiz P, Fowler BA, Osterloh JD, Fisher J, Mumtaz M. 2010. Physiologically based pharmacokinetic (PBPK) tool kit for environmental pollutants - metals. *SAR QSAR Environ Res* 21:603-618.
- Saraiva MC, Taichman RS, Braun T, Nriagu J, Eklund SA, Burt BA. 2007. Lead exposure and periodontitis in US adults. *J Periodontal Res* 42:45-52.
- Schechter A, Lucier GW, Cunningham ML, Abdo KM, Blumenthal G, Silver AG, et al. 2004. Human consumption of methyleugenol and its elimination from serum. *Environ Health Perspect* 112:678-680.
- Schober SE, Sinks TH, Jones RL, Bolger PM, McDowell M, Osterloh J, et al. 2003. Blood mercury levels in US children and women of childbearing age, 1999-2000. *J Am Med Assoc* 289:1667-1674.
- Schober SE, Mirel LB, Graubard BI, Brody DJ, Flegal KM. 2006. Blood lead levels and death from all causes, cardiovascular disease, and cancer: Results from the NHANES III mortality study. *Environ Health Perspect* 114:1538-1541.
- Schwartz GG, Ilyasova D, Ivanova A. 2003. Urinary cadmium, impaired fasting glucose, and diabetes in the NHANES III. *Diabetes Care* 26:468-470.
- Scinicariello. 2010. Modification by ALAD of the association between blood lead and blood pressure in the U.S. population: Results from the Third National Health and Nutrition Examination Survey (vol 118, pg 259, 2010). *Environ Health Perspect* 118:A426-A426.
- Scinicariello F, Abadin HG, Murray HE. 2011. Association of low-level blood lead and blood pressure in NHANES 1999-2006. *Environ Res* 111:1249-1257.
- Scott LL, Unice KM, Scott P, Nguyen LM, Haws LC, Harris M, et al. 2008. Addendum to: Evaluation of pcd/f and dioxin-like pcb serum concentration data from the 2001-2002 National Health and Nutrition Examination Survey of the United States population. *J Expo Sci Environ Epidemiol* 18:524-532.
- Scott LLF, Nguyen LM. 2011. Geographic region of residence and blood lead levels in US children: Results of the National Health and Nutrition Examination Survey. *Int Arch Occup Environ Health* 84:513-522.

- Shankar A, Teppala S, Sabanayagam C. 2012. Bisphenol A and peripheral arterial disease: Results from the NHANES. *Environ Health Perspect* 120:1297-1300.
- Shargorodsky J, Curhan SG, Henderson E, Eavey R, Curhan GC. 2011. Heavy metals exposure and hearing loss in US adolescents. *Arch Otolaryngol Head Neck Surg* 137:1183-1189.
- Sheehan MC, Burke TA, Breyse PN, Navas-Acien A, McGready J, Fox MA. 2012. Association of markers of chronic viral hepatitis and blood mercury levels in US reproductive-age women from NHANES 2001-2008: A cross-sectional study. *Environmental Health* 11:62.
- Shiue I. 2013. Urine phthalate concentrations are higher in people with stroke: United States National Health and Nutrition Examination Surveys (NHANES), 2001-2004. *Eur J Neurol* 20:728-731.
- Silva MJ, Barr DB, Reidy JA, Malek NA, Hodge CC, Caudill SP, et al. 2004. Urinary levels of seven phthalate metabolites in the U.S. population from the National Health and Nutrition Examination Survey (NHANES) 1999-2000. *Environ Health Perspect* 112:331-338.
- Silver MK, O'Neill MS, Sowers MR, Park SK. 2011. Urinary bisphenol A and type-2 diabetes in U.S. adults: Data from NHANES 2003-2008. *PLoS One* 6:e26868.
- Silver MK, Lozoff B, Meeker JD. 2013. Blood cadmium is elevated in iron deficient US children: A cross-sectional study. *Environ Health* 12:117.
- Simon JA, Hudes ES. 1999. Relationship of ascorbic acid to blood lead levels. *JAMA* 281:2289-2293.
- Sjodin A, Wong LY, Jones RS, Park A, Zhang Y, Hodge C, et al. 2008. Serum concentrations of polybrominated diphenyl ethers (PBDEs) and polybrominated biphenyl (PBB) in the United States population: 2003-2004. *Environ Sci Technol* 42:1377-1384.
- Soldin OP, Pezzullo JC, Hanak B, Miller M, Soldin SJ. 2003. Changing trends in the epidemiology of pediatric lead exposure: Interrelationship of blood lead and ZPP concentrations and a comparison to the US population. *Ther Drug Monit* 25:415-420.
- Stahlhut RW, van Wijngaarden E, Dye TD, Cook S, Swan SH. 2007. Concentrations of urinary phthalate metabolites are associated with increased waist circumference and insulin resistance in adult U.S. males. *Environ Health Perspect* 115:876-882.
- Stapleton HM, Sjodin A, Jones RS, Niehuser S, Zhang Y, Patterson DG, Jr. 2008. Serum levels of polybrominated diphenyl ethers (PBDEs) in foam recyclers and carpet installers working in the United States. *Environ Sci Technol* 42:3453-3458.

- Steinmaus C, Yuan Y, Liaw J, Smith AH. 2009. Low-level population exposure to inorganic arsenic in the United States and diabetes mellitus a reanalysis. *Epidemiology* 20:807-815.
- Stone BM, Reynolds CR. 2003. Can the National Health and Nutrition Examination Survey III (NHANES III) data help resolve the controversy over low blood lead levels and neuropsychological development in children? *Arch Clin Neuropsychol* 18:219-244.
- Stroop DM, Dietrich KN, Hunt AN, Suddendorf LR, Giangiacomo M. 2002. Lead-based paint health risk assessment in dependent children living in military housing. *Public Health Rep* 117:446-452.
- Sudakin DL, Smit E, Cardenas A, Harding A. 2013. Naphthalene biomarkers and relationship with hemoglobin and hematocrit in white, black, and hispanic adults: Results from the 2003-2004 National Health and Nutrition Examination Survey. *J Med Toxicol* 9:133-138.
- Suwan-ampai P, Navas-Acien A, Strickland PT, Agnew J. 2009. Involuntary tobacco smoke exposure and urinary levels of polycyclic aromatic hydrocarbons in the United States, 1999 to 2002. *Cancer Epidemiol Biomarkers Prev* 18:884-893.
- Tellez-Plaza M, Navas-Acien A, Crainiceanu CM, Guallar E. 2008. Cadmium exposure and hypertension in the 1999-2004 National Health and Nutrition Examination Survey (NHANES). *Environ Health Perspect* 116:51-56.
- Tellez-Plaza M, Navas-Acien A, Crainiceanu CM, Sharrett AR, Guallar E. 2010. Cadmium and peripheral arterial disease: Gender differences in the 1999-2004 US National Health and Nutrition Examination Survey. *Am J Epidemiol* 172:671-681.
- Tellez-Plaza M, Navas-Acien A, Caldwell KL, Menke A, Muntner P, Guallar E. 2012a. Reduction in cadmium exposure in the United States population, 1988-2008: The contribution of declining smoking rates. *Environ Health Perspect* 120:204-209.
- Tellez-Plaza M, Navas-Acien A, Menke A, Crainiceanu CM, Pastor-Barriuso R, Guallar E. 2012b. Cadmium exposure and all-cause and cardiovascular mortality in the U.S. general population. *Environ Health Perspect* 120:1017-1022.
- Teppala S, Madhavan S, Shankar A. 2012. Bisphenol A and metabolic syndrome: Results from NHANES. *Int J Endocrinol* 2012:598180.
- Tornero-Velez R, Davis J, Scollon EJ, Starr JM, Setzer RW, Goldsmith MR, et al. 2012. A pharmacokinetic model of cis- and trans-permethrin disposition in rats and humans with aggregate exposure application. *Toxicol Sci* 130:33-47.



- Trasande L, Attina TM, Sathyanarayana S, Spanier AJ, Blustein J. 2013a. Race/ethnicity-specific associations of urinary phthalates with childhood body mass in a nationally representative sample. *Environ Health Perspect* 121:501-506.
- Trasande L, Attina TM, Trachtman H. 2013b. Bisphenol A exposure is associated with low-grade urinary albumin excretion in children of the United States. *Kidney Int* 83:741-748.
- Trasande L, Sathyanarayana S, Spanier AJ, Trachtman H, Attina TM, Urbina EM. 2013c. Urinary phthalates are associated with higher blood pressure in childhood. *J Pediatr* 163:747-753 e741.
- Twum C, Wei Y. 2011. The association between urinary concentrations of dichlorophenol pesticides and obesity in children. *Rev Environ Health* 26:215-219.
- Tyrrell J, Melzer D, Henley W, Galloway TS, Osborne NJ. 2013. Associations between socioeconomic status and environmental toxicant concentrations in adults in the USA: NHANES 2001-2010. *Environ Int* 59:328-335.
- Vaidya SV, Kulkarni H. 2012. Association of urinary bisphenol A concentration with allergic asthma: Results from the National Health and Nutrition Examination Survey 2005-2006. *J Asthma* 49:800-806.
- van Wijngaarden E, Winters PC, Cory-Slechta DA. 2011. Blood lead levels in relation to cognitive function in older U.S. adults. *Neurotoxicology* 32:110-115.
- Vearrier D, Greenberg MI. 2012. Blood lead levels in the United States "oldest-old" population. *Clin Toxicol (Phila)* 50:838-840.
- Vesper HW, Caudill SP, Osterloh JD, Meyers T, Scott D, Myers GL. 2010. Exposure of the U.S. population to acrylamide in the National Health and Nutrition Examination Survey 2003-2004. *Environ Health Perspect* 118:278-283.
- Vesper HW, Sternberg MR, Frame T, Pfeiffer CM. 2013. Among 10 sociodemographic and lifestyle variables, smoking is strongly associated with biomarkers of acrylamide exposure in a representative sample of the US population. *J Nutr* 143:995s-1000s.
- Vupputuri S, Longnecker MP, Daniels JL, Guo XG, Sandler DP. 2005. Blood mercury level and blood pressure among US women: Results from the National Health and Nutrition Examination Survey 1999-2000. *Environ Res* 97:195-200.

- Wambaugh JF, Setzer RW, Reif DM, Gangwal S, Mitchell-Blackwood J, Arnot JA, et al. 2013. High-throughput models for exposure-based chemical prioritization in the expocast project. *Environ Sci Technol* 47:8479-8488.
- Wang RY, Jain RB, Wolkin AF, Rubin CH, Needham LL. 2009. Serum concentrations of selected persistent organic pollutants in a sample of pregnant females and changes in their concentrations during gestation. *Environ Health Perspect* 117:1244-1249.
- Wei Y, Zhu J, Nguyen A. 2014. Rice consumption and urinary concentrations of arsenic in US adults. *Int J Environ Health Res* 24:459-470.
- Wen LL, Lin LY, Su TC, Chen PC, Lin CY. 2013. Association between serum perfluorinated chemicals and thyroid function in US adults: The National Health and Nutrition Examination Survey 2007-2010. *J Clin Endocrinol Metab* 98:E1456-E1464.
- Wheeler W, Brown MJ. 2013. Blood lead levels in children aged 1-5 years - United States, 1999-2010. *MMWR Morb Mortal Wkly Rep* 62:245-248.
- Wittassek M, Wiesmuller GA, Koch HM, Eckard R, Dobler L, Muller J, et al. 2007. Internal phthalate exposure over the last two decades--a retrospective human biomonitoring study. *Int J Hyg Environ Health* 210:319-333.
- Wong le EY, Millette MD, Uddin MS, Needham LL, Patterson DG, Turner W, et al. 2008. Serum dioxin levels in residents of Calcasieu and Lafayette parishes, Louisiana with comparison to the US population. *J Expo Sci Environ Epidemiol* 18:252-261.
- Woodruff TJ, Zota AR, Schwartz JM. 2011. Environmental chemicals in pregnant women in the United States: NHANES 2003-2004. *Environ Health Perspect* 119:878-885.
- Wu Q, Magnus JH, Hentz JG. 2010. Urinary cadmium, osteopenia, and osteoporosis in the US population. *Osteoporos Int* 21:1449-1454.
- Wu T, Buck GM, Mendola P. 2003. Blood lead levels and sexual maturation in U.S. girls: The Third National Health and Nutrition Examination Survey, 1988-1994. *Environ Health Perspect* 111:737-741.
- Wu TJ, Sempos CT, Freudenheim JL, Muti P, Smith E. 2004. Serum iron, copper and zinc concentrations and risk of cancer mortality in US adults. *Ann Epidemiol* 14:195-201.
- Xu X, Dailey AB, Talbott EO, Ilacqua VA, Kearney G, Asal NR. 2010. Associations of serum concentrations of organochlorine pesticides with breast cancer and prostate cancer in U.S. adults. *Environ Health Perspect* 118:60-66.

- Xu X, Hu H, Kearney GD, Kan H, Sheps DS. 2013. Studying the effects of polycyclic aromatic hydrocarbons on peripheral arterial disease in the United States. *Sci Total Environ* 461-462:341-347.
- Xu XH, Cook RL, Ilacqua VA, Kan HD, Talbott EO, Kearney G. 2010. Studying associations between urinary metabolites of polycyclic aromatic hydrocarbons (PAHs) and cardiovascular diseases in the United States. *Sci Total Environ* 408:4943-4948.
- Xu XH, Nembhard WN, Kan HD, Kearney G, Zhang ZJ, Talbott EO. 2011. Urinary trichlorophenol levels and increased risk of attention deficit hyperactivity disorder among US school-aged children. *Occup Environ Med* 68:557-561.
- Xu XH, Hu H, Dailey AB, Kearney G, Talbott EO, Cook RL. 2013. Potential health impacts of heavy metals on HIV-infected population in USA. *PLoS One* 8:e74288.
- Xue JP, Zartarian V, Wang SW, Liu SV, Georgopoulos P. 2010. Probabilistic modeling of dietary arsenic exposure and dose and evaluation with 2003-2004 NHANES data. *Environ Health Perspect* 118:345-350.
- Yang JH, Lee YM, Bae SG, Jacobs DR, Lee DH. 2012. Associations between organochlorine pesticides and vitamin D deficiency in the US population. *PLoS One* 7:e30093
- Yang YC, Tan YM, Blount B, Murray C, Egan S, Bolger M, et al. 2012. Using a physiologically based pharmacokinetic model to link urinary biomarker concentrations to dietary exposure of perchlorate. *Chemosphere* 88:1019-1027.
- Yassin AS, Martonik JF. 2004. Urinary cadmium levels in the US working population, 1988-1994. *J Occup Environ Hyg* 1:324-333.
- Yassin AS, Martonik JF, Davidson JL. 2004. Blood lead levels in U.S. workers, 1988-1994. *J Occup Environ Med* 46:720-728.
- Ye XB, Pierik FH, Angerer J, Meltzer HM, Jaddoe VWV, Tiemeier H, et al. 2009. Levels of metabolites of organophosphate pesticides, phthalates, and bisphenol A in pooled urine specimens from pregnant women participating in the Norwegian Mother and Child Cohort Study (MoBa). *Int J Hyg Environ Health* 212:481-491.
- Zota AR, Rudel RA, Morello-Frosch RA, Brody JG. 2008. Elevated house dust and serum concentrations of PBDEs in California: Unintended consequences of furniture flammability standards? *Environ Sci Technol* 42:8158-8164.
